# Supplementary material for: Reduced Listening Effort with Adaptive Binaural Beamforming in Realistic Noisy Environments
Source: Preprints.org preprint supplement (doi:10.20944/preprints202410.2287.v1), 2024-10-29
Supplement: Supplementary file 1 [file supplementary]

## Sheet: Sheet1
Participant_ID	Order	Condition 1.SRT80-QOmni 2.SRT80-DM 3.SRT95-QOmni 4.SRT95-DM	Reaction_Time (ms)	Intelligibility Words correct
1	1	2	1584.94	3
1	1	2	1034.77	3
1	1	2	1134.82	4
1	1	2		3
1	1	2	1585.01	4
1	1	2	1635.3	3
1	1	2	1084.7	4
1	1	2	1334.92	1
1	1	2	1118.04	3
1	1	2	1034.71	5
1	1	2	1034.64	4
1	1	2	951.208	3
1	1	2	1401.43	3
1	1	2	767.666	4
1	1	2		4
1	1	2	1401.63	2
1	1	2		3
1	1	2		3
1	1	2	1084.54	4
1	1	2	984.547	3
1	1	1		2
1	1	1	1001.36	4
1	1	1	1368.14	5
1	1	1		3
1	1	1	1167.94	5
1	1	1	917.854	4
1	1	1	934.369	3
1	1	1	884.427	5
1	1	1		3
1	1	1	1168.12	5
1	1	1	867.631	5
1	1	1	951.26	4
1	1	1		3
1	1	1	800.913	5
1	1	1	734.263	4
1	1	1	901.052	5
1	1	1	767.859	4
1	1	1	884.513	5
1	1	1	817.903	5
1	1	1	834.345	5
1	1	4	884.484	5
1	1	4	717.74	5
1	1	4	667.592	4
1	1	4	751.165	5
1	1	4	684.281	5
1	1	4	601.054	4
1	1	4	751.069	5
1	1	4	817.84	5
1	1	4	801.052	4
1	1	4	784.392	5
1	1	4	817.62	5
1	1	4		5
1	1	4		4
1	1	4	734.13	5
1	1	4	817.901	5
1	1	4	784.262	5
1	1	4	717.745	3
1	1	4	767.615	5
1	1	4	750.929	5
1	1	4	767.527	5
1	1	3	817.574	5
1	1	3	700.804	4
1	1	3	834.444	5
1	1	3	817.803	2
1	1	3	668.23	5
1	1	3	700.96	5
1	1	3	851.088	5
1	1	3	884.604	5
1	1	3	767.793	5
1	1	3	650.797	5
1	1	3	750.844	5
1	1	3	717.598	5
1	1	3	700.859	4
1	1	3	650.771	5
1	1	3	700.991	5
1	1	3		5
1	1	3	684.289	5
1	1	3	767.616	4
1	1	3	750.781	5
1	1	3	700.981	5
1	2	2	684.128	5
1	2	2	750.84	5
1	2	2	601.113	5
1	2	2		5
1	2	2	784.324	4
1	2	2	784.162	5
1	2	2	801.071	5
1	2	2		3
1	2	2	851.091	5
1	2	2	767.644	3
1	2	2	851.024	5
1	2	2	717.497	4
1	2	2	634.008	4
1	2	2	784.31	4
1	2	2	717.52	4
1	2	2	650.895	3
1	2	2	834.351	5
1	2	2	951.219	5
1	2	2	717.519	5
1	2	2	867.665	3
1	2	3	634.083	5
1	2	3	800.925	4
1	2	3	634.222	4
1	2	3		4
1	2	3		3
1	2	3	700.872	5
1	2	3	717.78	5
1	2	3	800.792	5
1	2	3	700.83	5
1	2	3	667.507	5
1	2	3	850.871	5
1	2	3	684.154	4
1	2	3	684.139	4
1	2	3	667.36	4
1	2	3	734.199	5
1	2	3	700.841	4
1	2	3	734.143	4
1	2	3	650.71	4
1	2	3	617.471	4
1	2	3	684.085	2
1	2	1	601.546	5
1	2	1	700.847	5
1	2	1	767.67	4
1	2	1	700.999	3
1	2	1	700.927	3
1	2	1	700.933	4
1	2	1	700.847	5
1	2	1	700.899	4
1	2	1	667.596	5
1	2	1	750.856	4
1	2	1	684.069	3
1	2	1	917.946	5
1	2	1	734.221	4
1	2	1	800.872	5
1	2	1	717.556	4
1	2	1		5
1	2	1	851.128	5
1	2	1	834.393	5
1	2	1	734.123	3
1	2	1	734.03	4
1	2	4	700.854	4
1	2	4	817.829	4
1	2	4	767.566	4
1	2	4	801.001	5
1	2	4		5
1	2	4	917.418	5
1	2	4	734.097	3
1	2	4		5
1	2	4	684.302	4
1	2	4	784.347	5
1	2	4	784.213	4
1	2	4	700.75	5
1	2	4	784.281	5
1	2	4	784.497	5
1	2	4	934.39	3
1	2	4	767.528	5
1	2	4	634.128	3
1	2	4	817.584	5
1	2	4	1184.79	4
1	2	4	901.182	4
1	3	3	717.288	4
1	3	3	717.553	4
1	3	3	750.904	2
1	3	3	717.42	4
1	3	3	733.833	5
1	3	3	601.06	5
1	3	3	817.753	5
1	3	3	850.997	5
1	3	3		5
1	3	3	817.88	4
1	3	3	817.707	4
1	3	3		4
1	3	3	884.36	4
1	3	3	934.334	5
1	3	3	734.149	3
1	3	3	851.117	4
1	3	3	834.306	4
1	3	3	834.227	5
1	3	3	867.701	5
1	3	3	900.97	5
1	3	1	850.819	5
1	3	1	700.66	5
1	3	1	1001.21	5
1	3	1	683.975	5
1	3	1	717.284	4
1	3	1	767.51	5
1	3	1	750.907	5
1	3	1	734.191	2
1	3	1	784.737	5
1	3	1	801.075	5
1	3	1	968.048	5
1	3	1	850.946	2
1	3	1	784.13	3
1	3	1	834.213	4
1	3	1	934.267	5
1	3	1	750.868	4
1	3	1	734.185	5
1	3	1	4170.61	4
1	3	1		0
1	3	1	951.233	5
1	3	2	766.861	5
1	3	2	684.149	5
1	3	2	784.245	5
1	3	2	884.501	3
1	3	2		5
1	3	2	984.585	5
1	3	2	767.533	5
1	3	2	817.853	5
1	3	2	817.529	3
1	3	2	801.145	5
1	3	2	850.965	5
1	3	2	817.694	4
1	3	2		0
1	3	2	984.596	4
1	3	2	784.257	5
1	3	2	717.477	3
1	3	2	800.919	4
1	3	2	767.552	5
1	3	2	700.78	5
1	3	2	900.921	5
1	3	4	650.716	5
1	3	4	800.771	5
1	3	4	751.095	5
1	3	4	617.391	5
1	3	4	817.548	5
1	3	4	667.479	5
1	3	4	751.139	5
1	3	4	717.657	5
1	3	4	801.018	5
1	3	4	851.119	5
1	3	4	717.515	5
1	3	4	750.937	5
1	3	4	734.245	5
1	3	4	634.147	5
1	3	4	700.903	4
1	3	4	734.099	5
1	3	4	834.343	5
1	3	4	817.72	5
1	3	4	684.14	5
1	3	4	901.088	5
1	4	1	700.928	5
1	4	1	800.937	5
1	4	1	650.904	4
1	4	1	717.537	5
1	4	1	750.976	5
1	4	1	817.618	4
1	4	1	817.68	5
1	4	1	800.905	5
1	4	1	667.431	5
1	4	1	767.709	5
1	4	1	734.149	5
1	4	1	600.905	5
1	4	1	717.535	5
1	4	1	734.182	4
1	4	1	750.896	4
1	4	1	767.605	5
1	4	1		4
1	4	1	667.399	4
1	4	1	750.891	4
1	4	1	717.425	3
1	4	3	717.494	5
1	4	3	750.808	4
1	4	3	750.872	5
1	4	3	767.557	4
1	4	3	717.434	5
1	4	3	667.749	4
1	4	3	901.152	5
1	4	3	650.66	4
1	4	3	751.057	4
1	4	3	817.677	3
1	4	3	2819.38	5
1	4	3	767.527	5
1	4	3		5
1	4	3	1001.28	5
1	4	3	734.006	5
1	4	3	700.807	5
1	4	3	784.302	3
1	4	3	650.615	5
1	4	3	750.995	5
1	4	3	784.172	5
1	4	4	734.165	5
1	4	4	750.977	5
1	4	4	650.805	5
1	4	4	617.412	5
1	4	4	717.553	4
1	4	4	851.09	4
1	4	4	650.878	5
1	4	4	817.635	5
1	4	4		4
1	4	4	667.483	4
1	4	4	800.863	5
1	4	4	800.912	4
1	4	4	767.771	5
1	4	4	750.881	5
1	4	4	767.604	5
1	4	4	667.395	5
1	4	4	734.123	5
1	4	4	634.071	5
1	4	4	667.426	5
1	4	4		4
1	4	2	850.868	5
1	4	2	684.223	4
1	4	2	817.717	4
1	4	2	784.218	5
1	4	2	717.43	5
1	4	2	784.227	5
1	4	2	851.08	4
1	4	2	717.425	5
1	4	2	850.622	4
1	4	2	667.465	3
1	4	2	784.317	5
1	4	2	817.73	5
1	4	2	2819.53	5
1	4	2	784.138	4
1	4	2	684.166	5
1	4	2	717.706	5
1	4	2	700.833	3
1	4	2	984.38	5
1	4	2	734.112	5
1	4	2	717.474	4
2	1	3	1951.86	5
2	1	3	3253.25	5
2	1	3	3553.38	5
2	1	3	2619.18	4
2	1	3	3252.97	5
2	1	3	4187.1	5
2	1	3	3369.97	5
2	1	3	3553.61	4
2	1	3	1901.88	5
2	1	3	2452.32	5
2	1	3	3152.97	5
2	1	3	1534.88	5
2	1	3	3903.66	5
2	1	3	4053.83	4
2	1	3	4604.2	4
2	1	3	4003.83	5
2	1	3	4070.43	5
2	1	3	3770.37	5
2	1	3	4287.18	5
2	1	3	3686.94	5
2	1	2	4270.79	5
2	1	2	4837.71	5
2	1	2	4787.8	5
2	1	2	3753.67	5
2	1	2	3953.67	5
2	1	2	4070.54	5
2	1	2	2485.83	5
2	1	2	4737.75	3
2	1	2	4103.88	5
2	1	2		3
2	1	2		5
2	1	2		0
2	1	2	3636.91	5
2	1	2	3787.05	5
2	1	2		4
2	1	2	4921.22	5
2	1	2	3970.34	5
2	1	2	3520.03	5
2	1	2	2836	5
2	1	2	3753.61	5
2	1	1	4070.27	4
2	1	1		5
2	1	1	2168.67	5
2	1	1	2686.04	5
2	1	1	2435.35	5
2	1	1		0
2	1	1	3987.13	5
2	1	1	5004.6	4
2	1	1	4204.3	4
2	1	1	2802.88	5
2	1	1	1768.36	5
2	1	1	3570.1	5
2	1	1	1951.91	5
2	1	1	2769.2	5
2	1	1	1318.12	5
2	1	1	3937.14	5
2	1	1	3703.6	3
2	1	1	2469.23	5
2	1	1	2569.14	3
2	1	1	2285.56	5
2	1	4	1217.22	5
2	1	4	2669.29	5
2	1	4	2285.65	5
2	1	4	3720.27	5
2	1	4	1551.67	5
2	1	4	1818.57	5
2	1	4	2652.59	2
2	1	4	2052.27	5
2	1	4	2252.2	5
2	1	4	1401.6	5
2	1	4	1968.61	5
2	1	4	1985.26	5
2	1	4	2385.64	5
2	1	4	2469.03	5
2	1	4	1468.54	5
2	1	4	3303.14	5
2	1	4	2085.4	4
2	1	4	2585.79	5
2	1	4	2769.39	5
2	1	4	2569.14	4
2	2	1	3236.01	5
2	2	1	1801.73	5
2	2	1	2152.05	5
2	2	1	2452.35	5
2	2	1	2819.9	4
2	2	1	2735.89	5
2	2	1	3453.21	5
2	2	1	1401.7	5
2	2	1	3586.93	5
2	2	1	2936.16	5
2	2	1	2536	5
2	2	1	2218.92	5
2	2	1	1501.81	5
2	2	1	2402.41	5
2	2	1	3319.97	4
2	2	1	3770.33	5
2	2	1	3820.38	5
2	2	1	3153.2	4
2	2	1	1334.88	2
2	2	1	3486.49	5
2	2	2	1985.4	4
2	2	2	2118.74	5
2	2	2	2001.97	5
2	2	2	1668.41	5
2	2	2	1434.8	5
2	2	2	2185.43	5
2	2	2	1434.83	2
2	2	2	1434.79	4
2	2	2	1435.14	5
2	2	2		5
2	2	2	2352.09	5
2	2	2	1801.79	5
2	2	2	1234.79	5
2	2	2	2118.87	5
2	2	2	1251.58	5
2	2	2	3903.64	5
2	2	2	2202.19	5
2	2	2		2
2	2	2		1
2	2	2	1885.21	4
2	2	3	1184.73	4
2	2	3	1951.93	5
2	2	3	2152.13	4
2	2	3	1501.59	5
2	2	3	1234.7	5
2	2	3		0
2	2	3	2502.46	5
2	2	3	1768.43	5
2	2	3	1985.22	5
2	2	3	1718.45	4
2	2	3	1668.33	5
2	2	3	1935.18	5
2	2	3	2285.54	3
2	2	3	1735.07	5
2	2	3	2219.11	5
2	2	3	2419.05	3
2	2	3	1651.75	5
2	2	3	3653.6	4
2	2	3	2018.64	5
2	2	3	2152.01	4
2	2	4	3953.64	4
2	2	4	2369.05	5
2	2	4	1985.28	5
2	2	4	1685.02	5
2	2	4	1634.92	5
2	2	4	2085.43	5
2	2	4	1951.74	5
2	2	4	1351.61	5
2	2	4	1818.53	4
2	2	4	2135.41	5
2	2	4	1735.14	5
2	2	4	1534.98	5
2	2	4	1318.16	3
2	2	4	1635	4
2	2	4		4
2	2	4	2252.21	4
2	2	4	1618.36	5
2	2	4	1518.34	4
2	2	4		2
2	2	4	2035.29	5
2	3	2	1985.25	5
2	3	2	1701.62	5
2	3	2	1351.59	5
2	3	2	1701.58	5
2	3	2	3536.78	5
2	3	2	1734.95	5
2	3	2	1601.76	5
2	3	2		3
2	3	2	1635.2	5
2	3	2	2102.08	2
2	3	2	1585.02	5
2	3	2	2052.01	4
2	3	2		4
2	3	2	1985.28	5
2	3	2	1718.43	5
2	3	2	2852.76	5
2	3	2	1268.14	4
2	3	2	1368.26	5
2	3	2	2168.82	5
2	3	2	3319.97	5
2	3	1	2001.93	5
2	3	1	2919.45	5
2	3	1	1835.17	5
2	3	1	1768.33	5
2	3	1	1835.17	5
2	3	1	2569.14	5
2	3	1	1668.38	5
2	3	1	1701.73	4
2	3	1	1501.63	5
2	3	1	2552.5	5
2	3	1	1918.51	4
2	3	1	3119.62	5
2	3	1	1401.6	4
2	3	1	1951.95	5
2	3	1	1718.42	4
2	3	1	1801.89	4
2	3	1	2118.68	5
2	3	1		3
2	3	1	1534.81	5
2	3	1		5
2	3	3	2502.38	5
2	3	3	1901.9	4
2	3	3	1435.12	5
2	3	3	3102.9	5
2	3	3	2652.62	5
2	3	3	1951.98	5
2	3	3	1635.01	5
2	3	3	2018.67	5
2	3	3		5
2	3	3	2118.71	4
2	3	3	2369.01	5
2	3	3	1985.29	5
2	3	3	2602.52	5
2	3	3	2235.5	5
2	3	3	1718.36	5
2	3	3	2018.68	4
2	3	3	2252.19	5
2	3	3	1701.6	5
2	3	3	1368.12	5
2	3	3	1251.7	5
2	3	4	3653.67	5
2	3	4	1785.11	4
2	3	4	1851.85	5
2	3	4	2085.27	5
2	3	4	1284.76	5
2	3	4	1268.21	4
2	3	4	2052.02	5
2	3	4		4
2	3	4	1701.89	5
2	3	4	1801.82	5
2	3	4	2602.4	5
2	3	4	1785.27	5
2	3	4	1551.63	5
2	3	4	1785.19	5
2	3	4	1584.99	5
2	3	4	1735.05	5
2	3	4	2268.95	5
2	3	4	2168.79	5
2	3	4	2268.84	4
2	3	4		4
2	4	4	1801.91	5
2	4	4	2435.79	4
2	4	4	2352.42	5
2	4	4	1885.23	4
2	4	4	1785.08	5
2	4	4	1868.53	4
2	4	4	1485.01	5
2	4	4	2435.71	5
2	4	4	1985.28	5
2	4	4	1718.41	5
2	4	4	2152.08	5
2	4	4	3603.48	5
2	4	4	1651.75	5
2	4	4	1901.95	5
2	4	4	1535.03	5
2	4	4	2252.25	5
2	4	4	1701.75	5
2	4	4	2669.21	5
2	4	4	2752.62	4
2	4	4	1651.7	5
2	4	3	1901.83	5
2	4	3	1368.15	5
2	4	3	1335.05	5
2	4	3	1351.56	5
2	4	3	1451.6	5
2	4	3	1885.27	4
2	4	3	1768.41	5
2	4	3	1401.49	5
2	4	3	1634.9	5
2	4	3	2001.93	5
2	4	3	2469.06	5
2	4	3	1952.01	5
2	4	3	2418.94	5
2	4	3	1751.78	5
2	4	3	2051.95	5
2	4	3	1985.32	4
2	4	3	1668.51	5
2	4	3	1718.35	5
2	4	3		3
2	4	3	1835.16	4
2	4	1	1885.12	5
2	4	1	1885.31	5
2	4	1	1851.82	5
2	4	1	1401.47	5
2	4	1	1668.63	5
2	4	1	4937.78	4
2	4	1	3586.75	5
2	4	1	1868.48	4
2	4	1	4120.63	4
2	4	1	1651.67	5
2	4	1	2268.87	5
2	4	1		4
2	4	1		0
2	4	1	1668.28	2
2	4	1	2569.27	5
2	4	1		0
2	4	1	1968.63	5
2	4	1	1985.31	4
2	4	1	3286.52	5
2	4	1	1701.84	5
2	4	2	1918.56	5
2	4	2	1918.56	4
2	4	2	3203.27	5
2	4	2	2001.96	4
2	4	2	1468.28	5
2	4	2	1618.37	4
2	4	2	1952.05	5
2	4	2	1851.91	5
2	4	2	3620.22	5
2	4	2	2552.44	5
2	4	2	3887.03	5
2	4	2	2368.98	5
2	4	2	2735.87	5
2	4	2	1668.32	5
2	4	2	1901.87	4
2	4	2	2152.21	5
2	4	2	2435.8	4
2	4	2	1785.09	5
2	4	2	3636.94	5
2	4	2	3253.04	5
3	1	4	1334.81	5
3	1	4		5
3	1	4	1184.68	5
3	1	4	1334.88	4
3	1	4	1234.95	5
3	1	4	1051.48	5
3	1	4	1618.8	5
3	1	4	1251.36	5
3	1	4	951.137	5
3	1	4	1084.59	5
3	1	4	1601.72	5
3	1	4	834.338	5
3	1	4	1318.22	4
3	1	4	1001.33	5
3	1	4	884.295	5
3	1	4	1067.93	5
3	1	4	1084.7	4
3	1	4	884.198	5
3	1	4	884.362	5
3	1	4	1034.54	5
3	1	1	984.673	4
3	1	1	917.837	4
3	1	1		3
3	1	1	1168.08	5
3	1	1	917.827	4
3	1	1	1201.35	5
3	1	1		0
3	1	1	1034.55	3
3	1	1	1368.18	5
3	1	1	901.056	4
3	1	1	1218.16	5
3	1	1	1201.32	5
3	1	1	951.255	4
3	1	1	1351.45	4
3	1	1		0
3	1	1	3953.91	5
3	1	1	900.971	4
3	1	1	1201.51	4
3	1	1		4
3	1	1	884.295	5
3	1	3	984.569	4
3	1	3	1017.83	5
3	1	3	884.243	5
3	1	3	1785.1	5
3	1	3	1067.84	5
3	1	3		0
3	1	3	767.735	5
3	1	3	2519.13	5
3	1	3	1118.03	4
3	1	3	1067.99	5
3	1	3	784.321	5
3	1	3	951.213	5
3	1	3	1134.77	5
3	1	3	1084.61	5
3	1	3	1101.3	5
3	1	3	1268.07	4
3	1	3	1051.13	5
3	1	3	1084.63	5
3	1	3	1001.21	3
3	1	3	884.401	4
3	1	2	867.657	5
3	1	2	1034.61	5
3	1	2	800.775	5
3	1	2	1051.12	5
3	1	2	1134.86	5
3	1	2	951.171	5
3	1	2	934.371	5
3	1	2	1151.29	5
3	1	2		4
3	1	2	1117.85	5
3	1	2	817.598	5
3	1	2	734.175	5
3	1	2	1184.82	5
3	1	2	1067.84	5
3	1	2	1084.6	5
3	1	2	1801.77	5
3	1	2	917.753	4
3	1	2	1067.81	5
3	1	2	1018.01	5
3	1	2	951.496	3
3	2	3	934.444	4
3	2	3	767.548	5
3	2	3	1018.03	5
3	2	3	984.692	5
3	2	3	1118.08	5
3	2	3	951.182	5
3	2	3	700.832	5
3	2	3	1284.83	5
3	2	3	917.813	5
3	2	3	1568.41	5
3	2	3	1034.53	5
3	2	3	800.812	5
3	2	3	867.602	5
3	2	3		5
3	2	3	1234.79	5
3	2	3	951.197	5
3	2	3	784.187	5
3	2	3	867.911	5
3	2	3	684.248	4
3	2	3	1001.05	5
3	2	2	784.192	4
3	2	2	934.417	4
3	2	2	1384.91	4
3	2	2	884.552	5
3	2	2	967.735	5
3	2	2	1017.78	3
3	2	2	1084.49	2
3	2	2	1634.97	4
3	2	2	834.431	5
3	2	2	934.345	5
3	2	2	1051.3	4
3	2	2		5
3	2	2	1051.35	5
3	2	2	1101.39	4
3	2	2	951.032	5
3	2	2	1001.24	5
3	2	2	1001.19	4
3	2	2	767.609	4
3	2	2	1001.21	4
3	2	2	1184.94	5
3	2	1	851.106	5
3	2	1	1217.92	5
3	2	1	1117.99	5
3	2	1	1001.21	5
3	2	1	1218.03	5
3	2	1	1067.91	2
3	2	1	867.573	5
3	2	1	1051.15	5
3	2	1	1284.91	3
3	2	1	1001.12	5
3	2	1	884.307	5
3	2	1	900.944	5
3	2	1	1201.5	5
3	2	1		3
3	2	1		3
3	2	1	984.532	2
3	2	1		4
3	2	1	1101.24	4
3	2	1	934.374	4
3	2	1	1101.32	5
3	2	4	1784.53	5
3	2	4	1051.4	5
3	2	4	1017.99	5
3	2	4	1067.84	5
3	2	4	1151.41	5
3	2	4	1068.05	5
3	2	4	884.39	5
3	2	4	917.808	5
3	2	4	1017.94	4
3	2	4	934.319	5
3	2	4	1017.91	5
3	2	4	817.769	5
3	2	4	684.268	5
3	2	4	734.13	4
3	2	4	700.677	5
3	2	4	1017.83	5
3	2	4	967.892	5
3	2	4	901.042	5
3	2	4	1201.39	5
3	2	4	1018.09	5
3	3	3	817.37	5
3	3	3	1718.27	5
3	3	3	1067.57	5
3	3	3	967.808	5
3	3	3	1034.23	5
3	3	3	951.283	5
3	3	3	1034.93	5
3	3	3	901.216	5
3	3	3	1018.14	5
3	3	3	1117.94	5
3	3	3	867.649	5
3	3	3	951.411	5
3	3	3	884.508	5
3	3	3	1085.09	5
3	3	3	1034.35	3
3	3	3	2535.85	4
3	3	3	950.894	5
3	3	3	834.285	5
3	3	3	700.747	4
3	3	3	1001.25	5
3	3	4	1067.03	5
3	3	4	951.116	5
3	3	4	984.553	5
3	3	4	1001.24	5
3	3	4	1151.42	5
3	3	4	934.518	5
3	3	4	1067.77	4
3	3	4	901.09	5
3	3	4	967.866	5
3	3	4	1051.35	5
3	3	4	951.268	5
3	3	4	1001.16	5
3	3	4	934.519	3
3	3	4	901.018	5
3	3	4	867.8	5
3	3	4	867.667	5
3	3	4	1284.68	5
3	3	4		5
3	3	4	984.534	4
3	3	4	1184.71	5
3	3	2		3
3	3	2	734.271	5
3	3	2	950.95	5
3	3	2	817.641	4
3	3	2	984.506	5
3	3	2		2
3	3	2	1067.82	4
3	3	2	1034.59	5
3	3	2	734.185	4
3	3	2	1284.96	5
3	3	2	1067.83	4
3	3	2	801.074	4
3	3	2	800.889	5
3	3	2	1334.92	4
3	3	2	1017.89	5
3	3	2	1685.03	3
3	3	2	951.278	4
3	3	2	951.274	4
3	3	2	934.448	5
3	3	2	917.465	5
3	3	1	800.929	4
3	3	1	1117.89	5
3	3	1	951.138	4
3	3	1	1484.86	5
3	3	1	951.087	5
3	3	1	1218.19	4
3	3	1	1101.33	5
3	3	1	1301.4	2
3	3	1		3
3	3	1	3319.99	4
3	3	1	917.731	5
3	3	1	967.735	3
3	3	1	1100.94	5
3	3	1	1101.28	5
3	3	1		4
3	3	1	1184.91	4
3	3	1	1001.2	5
3	3	1	867.698	4
3	3	1	984.563	4
3	3	1	1201.39	4
3	4	4	917.804	5
3	4	4	934.517	4
3	4	4	1151.32	5
3	4	4	984.626	5
3	4	4	934.552	5
3	4	4	1218.47	5
3	4	4	867.617	5
3	4	4	1084.65	5
3	4	4	900.998	4
3	4	4	1017.94	5
3	4	4	1268.08	5
3	4	4	984.55	5
3	4	4	800.959	5
3	4	4	1034.63	5
3	4	4	1001.05	5
3	4	4	1051.2	5
3	4	4	984.52	5
3	4	4	984.748	5
3	4	4	917.692	5
3	4	4	1151.2	5
3	4	3	1017.69	4
3	4	3	1218.06	5
3	4	3	900.919	5
3	4	3	817.631	5
3	4	3	1017.71	5
3	4	3	1101.2	5
3	4	3	2552.48	5
3	4	3	1218.27	5
3	4	3	1034.75	5
3	4	3	1018.02	5
3	4	3	951.215	5
3	4	3	917.649	5
3	4	3	1268.15	5
3	4	3	884.569	5
3	4	3	817.559	5
3	4	3	1017.78	5
3	4	3	750.847	5
3	4	3	750.811	5
3	4	3	834.228	5
3	4	3	867.789	5
3	4	2	1001.17	5
3	4	2	1115.97	4
3	4	2	1168.12	5
3	4	2	1084.69	5
3	4	2	951.017	5
3	4	2	4337.32	5
3	4	2	1117.99	5
3	4	2	951.267	2
3	4	2	750.752	3
3	4	2	1018.02	5
3	4	2	1001.08	5
3	4	2	1084.68	4
3	4	2	1118.06	5
3	4	2	1051.27	5
3	4	2	1067.9	5
3	4	2	817.607	5
3	4	2	817.57	4
3	4	2	1134.66	5
3	4	2	934.467	5
3	4	2	867.604	5
3	4	1	984.354	5
3	4	1	750.77	5
3	4	1		3
3	4	1	1184.74	3
3	4	1	1118.12	5
3	4	1	1551.73	5
3	4	1	750.846	4
3	4	1	1318.18	4
3	4	1		5
3	4	1	800.919	5
3	4	1	800.902	5
3	4	1	917.713	4
3	4	1		4
3	4	1	967.881	5
3	4	1	817.662	5
3	4	1	1634.94	5
3	4	1	1001.14	5
3	4	1	934.392	5
3	4	1	1251.59	5
3	4	1	934.652	4
4	1	1	4086.88	5
4	1	1	5238.14	2
4	1	1		0
4	1	1		3
4	1	1	3819.78	1
4	1	1		0
4	1	1	3136.38	3
4	1	1	4737.75	3
4	1	1	4621.28	5
4	1	1	4437.6	5
4	1	1	5555.13	2
4	1	1	3937.25	3
4	1	1	4804.43	1
4	1	1	4170.72	4
4	1	1	5321.46	5
4	1	1	4487.46	4
4	1	1		0
4	1	1	3887.31	5
4	1	1		0
4	1	1		4
4	1	4		1
4	1	4	4170.47	5
4	1	4	4354	4
4	1	4		3
4	1	4	4270.56	5
4	1	4	2402.43	3
4	1	4	5071.34	4
4	1	4	5188.01	1
4	1	4		3
4	1	4	3470.09	4
4	1	4	4187.25	3
4	1	4	4137.08	5
4	1	4	3870.27	3
4	1	4	4520.85	5
4	1	4	4087.13	5
4	1	4	4487.46	4
4	1	4		2
4	1	4	4070.48	3
4	1	4	4787.75	3
4	1	4		5
4	1	2	3870.14	3
4	1	2	4287.38	4
4	1	2	3987.16	5
4	1	2	3803.7	4
4	1	2	4420.83	4
4	1	2	4337.3	3
4	1	2	4270.74	5
4	1	2		3
4	1	2	4020.37	5
4	1	2		5
4	1	2	3920.28	5
4	1	2	4287.51	5
4	1	2	4637.71	5
4	1	2	4687.73	5
4	1	2	4304.02	5
4	1	2		4
4	1	2	4454.2	2
4	1	2	5321.52	2
4	1	2	4253.94	3
4	1	2	4487.4	2
4	1	3	4070.44	5
4	1	3	4520.95	4
4	1	3	4254.04	4
4	1	3	5371.57	3
4	1	3		0
4	1	3	4087.16	4
4	1	3	5037.99	4
4	1	3	4520.99	3
4	1	3	3870.39	5
4	1	3	3920.32	5
4	1	3		1
4	1	3	3470.14	5
4	1	3		2
4	1	3		4
4	1	3		1
4	1	3	4737.65	3
4	1	3	1935.35	2
4	1	3	3870.41	5
4	1	3	3603.45	4
4	1	3	4170.47	5
4	2	3	3019.56	5
4	2	3	3970.32	4
4	2	3	4137.11	4
4	2	3	3887.13	4
4	2	3		0
4	2	3	3570.06	4
4	2	3	4921.21	5
4	2	3	5121.36	4
4	2	3	4287.27	4
4	2	3	4020.49	4
4	2	3		5
4	2	3	3520.13	3
4	2	3	3970.41	3
4	2	3	2969.48	5
4	2	3	3853.73	3
4	2	3		1
4	2	3	3853.6	4
4	2	3	4037.05	5
4	2	3		3
4	2	3	2135.41	5
4	2	1	1268.17	4
4	2	1	3019.62	3
4	2	1	2952.77	3
4	2	1	2435.79	3
4	2	1	2635.85	5
4	2	1	1635.21	3
4	2	1	1968.61	5
4	2	1	4504.1	3
4	2	1	2085.38	5
4	2	1	1568.26	4
4	2	1		4
4	2	1	3052.87	4
4	2	1	1718.37	2
4	2	1	1685.1	4
4	2	1		3
4	2	1	1301.42	5
4	2	1	1468.31	3
4	2	1	2202.12	4
4	2	1		1
4	2	1	4270.59	2
4	2	2	1484.87	4
4	2	2	1868.58	5
4	2	2	1451.62	3
4	2	2	5304.84	3
4	2	2	1435.13	5
4	2	2		1
4	2	2	1818.61	5
4	2	2	2652.68	5
4	2	2		5
4	2	2	1301.45	4
4	2	2	2285.52	3
4	2	2	1284.83	5
4	2	2	2569.05	3
4	2	2	1518.21	5
4	2	2	3553.35	4
4	2	2	2368.99	3
4	2	2	2202.01	4
4	2	2	1201.43	4
4	2	2	2519.11	3
4	2	2	1418.34	4
4	2	4	1385.82	4
4	2	4	1402.1	5
4	2	4	1351.57	5
4	2	4	2018.66	4
4	2	4	1101.36	4
4	2	4	3419.77	5
4	2	4	1401.43	4
4	2	4	2485.74	4
4	2	4	1201.22	3
4	2	4	784.244	5
4	2	4	1534.9	5
4	2	4	2685.98	5
4	2	4		4
4	2	4	2285.55	2
4	2	4		4
4	2	4		5
4	2	4	2652.51	5
4	2	4	1168.04	5
4	2	4	1718.41	4
4	2	4	1434.97	4
4	3	2		5
4	3	2	1601.59	4
4	3	2	1067.99	5
4	3	2	1701.77	4
4	3	2	2402.32	5
4	3	2	3403.32	3
4	3	2	934.418	3
4	3	2	1618.35	5
4	3	2	1401.59	5
4	3	2	1218.07	3
4	3	2	5388.22	5
4	3	2	1284.73	4
4	3	2	1318.16	4
4	3	2	1134.71	5
4	3	2	1184.69	4
4	3	2	1551.6	5
4	3	2	834.173	4
4	3	2	1168.14	4
4	3	2	1168.02	5
4	3	2	1534.92	5
4	3	1	1335.68	5
4	3	1	1484.99	4
4	3	1	1384.76	4
4	3	1	1184.66	2
4	3	1	1017.83	4
4	3	1	550.704	5
4	3	1		3
4	3	1		3
4	3	1	817.604	4
4	3	1	1234.74	3
4	3	1	2719.31	1
4	3	1	2585.78	2
4	3	1	1468.19	2
4	3	1	2569.13	4
4	3	1	4070.41	4
4	3	1	3686.86	5
4	3	1	1835.24	5
4	3	1	1918.56	5
4	3	1	1218.09	5
4	3	1	1551.46	3
4	3	4	1434.48	4
4	3	4	1351.4	4
4	3	4	2418.93	4
4	3	4		4
4	3	4	1434.23	5
4	3	4	1318.08	5
4	3	4	1668.39	5
4	3	4	1085.11	5
4	3	4	2769.34	3
4	3	4	1284.73	4
4	3	4	1468.53	5
4	3	4	1201.46	4
4	3	4	1134.75	4
4	3	4	2435.67	5
4	3	4	1535.27	5
4	3	4	1751.79	4
4	3	4	1034.57	3
4	3	4	1051.22	4
4	3	4		5
4	3	4		4
4	3	3	1417.31	4
4	3	3	5037.98	3
4	3	3	1067.98	4
4	3	3	1034.65	4
4	3	3	2469.06	3
4	3	3	1768.54	4
4	3	3	1585.03	5
4	3	3	1201.38	4
4	3	3	967.991	4
4	3	3	1251.41	5
4	3	3		3
4	3	3		5
4	3	3	1234.79	4
4	3	3	1484.91	4
4	3	3	2402.37	1
4	3	3	2252.36	2
4	3	3	2385.66	4
4	3	3	1318.64	3
4	3	3	1401.43	5
4	3	3	4003.71	3
4	4	3		0
4	4	3	1601.82	3
4	4	3	1318.2	4
4	4	3	1701.73	5
4	4	3	1351.7	5
4	4	3	2719.27	4
4	4	3	1951.83	3
4	4	3	1084.59	5
4	4	3	1118.08	4
4	4	3	1318.21	4
4	4	3		4
4	4	3	3336.68	4
4	4	3	1751.77	3
4	4	3	1351.53	5
4	4	3	1968.6	3
4	4	3	1951.9	4
4	4	3		5
4	4	3	2368.9	4
4	4	3	1067.91	4
4	4	3	1018	2
4	4	4	1034.28	4
4	4	4	1267.96	4
4	4	4	1434.88	5
4	4	4	1051.36	3
4	4	4	1151.46	3
4	4	4		5
4	4	4	1067.99	4
4	4	4	1268.21	5
4	4	4	2035.21	3
4	4	4	1484.87	5
4	4	4	2569.07	4
4	4	4	1435.1	5
4	4	4	1401.61	4
4	4	4	1534.95	4
4	4	4	1034.62	3
4	4	4		5
4	4	4	984.716	4
4	4	4	917.936	5
4	4	4	1918.55	3
4	4	4	1284.71	4
4	4	2		4
4	4	2	1268.21	5
4	4	2	1318.26	5
4	4	2	1234.95	5
4	4	2	2118.68	4
4	4	2	2902.63	5
4	4	2	1735.08	4
4	4	2	2319.1	1
4	4	2	1034.61	4
4	4	2	1034.42	5
4	4	2	1951.99	4
4	4	2		4
4	4	2	1168.07	5
4	4	2	1134.74	5
4	4	2	1468.21	3
4	4	2	1635.04	3
4	4	2		5
4	4	2	1318.33	5
4	4	2	1601.63	5
4	4	2	1368.17	4
4	4	1	1551.7	3
4	4	1		2
4	4	1	1184.76	5
4	4	1	4404.05	3
4	4	1	1518.58	3
4	4	1	4504.1	4
4	4	1	1051.41	1
4	4	1	1651.86	5
4	4	1	1268.15	4
4	4	1	3069.61	5
4	4	1	2602.5	5
4	4	1	1034.46	3
4	4	1	1268.3	3
4	4	1	1901.81	5
4	4	1	967.842	3
4	4	1	1835.24	3
4	4	1	2902.78	3
4	4	1		5
4	4	1		4
4	4	1		4
5	1	4	1101.12	5
5	1	4	900.982	5
5	1	4	800.861	5
5	1	4	934.308	4
5	1	4		5
5	1	4	967.687	5
5	1	4	1318.29	4
5	1	4	901.322	5
5	1	4	934.374	5
5	1	4	1218.04	5
5	1	4	984.612	5
5	1	4	767.634	5
5	1	4	1017.85	5
5	1	4	1034.51	5
5	1	4	967.974	3
5	1	4	1001.46	5
5	1	4	917.873	4
5	1	4	1301.46	5
5	1	4	850.998	5
5	1	4	2735.89	5
5	1	3		4
5	1	3	1034.54	5
5	1	3	1234.77	4
5	1	3	967.769	4
5	1	3	934.373	5
5	1	3	1184.87	5
5	1	3	850.991	5
5	1	3	834.216	4
5	1	3	934.635	5
5	1	3	1101.53	4
5	1	3	901.051	5
5	1	3	984.51	5
5	1	3	1151.36	5
5	1	3	901.096	5
5	1	3	734.023	5
5	1	3	800.924	5
5	1	3	817.712	5
5	1	3		4
5	1	3	967.878	5
5	1	3	934.405	5
5	1	2	851.009	4
5	1	2	1284.84	3
5	1	2	867.671	5
5	1	2	1001.22	5
5	1	2	984.627	5
5	1	2	951.113	5
5	1	2	1151.31	5
5	1	2	1501.53	5
5	1	2	901.179	5
5	1	2	867.637	5
5	1	2	901.039	5
5	1	2	851.017	5
5	1	2	1001.18	4
5	1	2	867.586	5
5	1	2	1051.43	5
5	1	2	1051.34	4
5	1	2	1835.14	5
5	1	2	1100.9	4
5	1	2	917.721	4
5	1	2	1034.67	4
5	1	1	1601.78	5
5	1	1	984.485	5
5	1	1	1017.89	5
5	1	1	1134.73	5
5	1	1		3
5	1	1	1218.09	2
5	1	1	1401.59	5
5	1	1	1068.1	5
5	1	1	984.486	5
5	1	1	1001.31	5
5	1	1		4
5	1	1	934.49	5
5	1	1	951.205	5
5	1	1	1051.31	5
5	1	1	1051.25	4
5	1	1		1
5	1	1	901.093	5
5	1	1	967.807	4
5	1	1	1434.93	3
5	1	1	1468.3	4
5	2	3	934.449	5
5	2	3	834.24	5
5	2	3	917.92	5
5	2	3	801.059	5
5	2	3		3
5	2	3	1001.16	5
5	2	3	1134.72	5
5	2	3	1017.92	4
5	2	3	2519.05	5
5	2	3	1034.43	3
5	2	3	1118.09	5
5	2	3	967.701	5
5	2	3	817.621	5
5	2	3	850.936	5
5	2	3	1051.12	4
5	2	3		4
5	2	3	867.619	5
5	2	3	917.848	5
5	2	3	1334.95	5
5	2	3	1118.03	4
5	2	1	884.324	4
5	2	1	934.662	5
5	2	1	951.096	5
5	2	1	917.593	5
5	2	1	1118.14	5
5	2	1	1017.91	5
5	2	1	1001.15	4
5	2	1	1068.04	3
5	2	1	1268.14	5
5	2	1		4
5	2	1	984.56	5
5	2	1	784.529	5
5	2	1	1051.22	5
5	2	1	1251.44	5
5	2	1		4
5	2	1	884.192	5
5	2	1	917.899	4
5	2	1	867.845	5
5	2	1	951.356	4
5	2	1		3
5	2	4	967.82	4
5	2	4	967.89	5
5	2	4	967.855	5
5	2	4	734.109	5
5	2	4	951.124	5
5	2	4	901.045	5
5	2	4	1351.55	5
5	2	4	1234.79	4
5	2	4	934.358	5
5	2	4	1051.3	5
5	2	4	967.834	5
5	2	4	951.119	5
5	2	4	984.375	5
5	2	4	984.68	5
5	2	4		4
5	2	4	1017.71	3
5	2	4	1034.61	5
5	2	4	1234.76	5
5	2	4	1017.75	4
5	2	4	1001.12	4
5	2	2	968.025	5
5	2	2	967.786	5
5	2	2	1001.18	5
5	2	2	934.592	5
5	2	2	1067.92	4
5	2	2	834.435	5
5	2	2	901.146	5
5	2	2		3
5	2	2	917.742	5
5	2	2	951.209	5
5	2	2	934.411	5
5	2	2	951.199	5
5	2	2	867.675	5
5	2	2	750.939	3
5	2	2	901.019	5
5	2	2	901.165	5
5	2	2	1034.69	5
5	2	2	817.614	4
5	2	2	1101.5	5
5	2	2	3069.63	4
5	3	2	834.085	5
5	3	2	1001.21	5
5	3	2	784.523	5
5	3	2	901.068	5
5	3	2	901.226	5
5	3	2	1034.61	5
5	3	2		4
5	3	2		4
5	3	2	1001.13	5
5	3	2	1568.31	5
5	3	2	1068.09	5
5	3	2	1251.44	4
5	3	2	934.324	5
5	3	2	850.949	5
5	3	2	1017.95	5
5	3	2	951.199	5
5	3	2		4
5	3	2	1001.23	5
5	3	2	1034.67	5
5	3	2	867.731	5
5	3	3	834.229	5
5	3	3	1001.24	5
5	3	3	984.514	5
5	3	3	1034.62	5
5	3	3	917.814	5
5	3	3	901.125	5
5	3	3	801.17	5
5	3	3	867.709	4
5	3	3	1034.6	4
5	3	3	1001.23	5
5	3	3	834.207	5
5	3	3	801.159	4
5	3	3	834.418	5
5	3	3	967.621	4
5	3	3	968.08	5
5	3	3		5
5	3	3	901.016	4
5	3	3	1084.61	5
5	3	3	967.899	4
5	3	3	1051.17	5
5	3	1	1268.05	5
5	3	1	1167.9	5
5	3	1	867.753	5
5	3	1	967.874	5
5	3	1	901.031	5
5	3	1	734.201	4
5	3	1	2669.24	4
5	3	1	834.413	5
5	3	1	1134.72	4
5	3	1	900.926	4
5	3	1	1034.62	5
5	3	1	984.3	5
5	3	1	867.738	4
5	3	1	1117.92	5
5	3	1	1151.16	5
5	3	1	851.179	4
5	3	1	750.824	5
5	3	1	1568.3	3
5	3	1	1134.64	5
5	3	1	2052.01	4
5	3	4	967.68	5
5	3	4	951.353	5
5	3	4	951.295	4
5	3	4	851.11	5
5	3	4	1501.63	4
5	3	4	1084.71	5
5	3	4	934.608	5
5	3	4	918.077	5
5	3	4	917.883	5
5	3	4	1068.03	5
5	3	4	1001.17	5
5	3	4	1018.02	5
5	3	4	1368.12	5
5	3	4	901.147	5
5	3	4	767.78	4
5	3	4	850.989	5
5	3	4	1101.29	5
5	3	4	934.507	5
5	3	4	901.075	5
5	3	4	884.42	5
5	4	4	901.096	5
5	4	4	851.181	4
5	4	4	951.111	5
5	4	4	934.386	5
5	4	4	817.568	5
5	4	4	901.051	4
5	4	4	867.757	4
5	4	4	851.041	5
5	4	4	967.854	5
5	4	4	817.76	5
5	4	4	901.181	5
5	4	4	867.849	5
5	4	4	800.925	4
5	4	4	850.988	5
5	4	4	967.796	5
5	4	4	917.69	4
5	4	4	817.737	5
5	4	4	984.718	5
5	4	4	800.938	5
5	4	4	801.015	5
5	4	3	850.912	5
5	4	3	1034.68	5
5	4	3	817.648	5
5	4	3	1017.84	5
5	4	3	984.555	5
5	4	3	851.027	4
5	4	3	1017.9	5
5	4	3	984.608	5
5	4	3		5
5	4	3	834.152	5
5	4	3	784.296	5
5	4	3	1001.43	5
5	4	3	1001.27	5
5	4	3	901.102	5
5	4	3	1084.55	4
5	4	3	901.239	5
5	4	3	917.84	5
5	4	3	967.911	5
5	4	3	817.367	4
5	4	3	901.285	5
5	4	2	1017.92	5
5	4	2	917.676	5
5	4	2	817.587	5
5	4	2	1318.29	5
5	4	2	1067.73	5
5	4	2	1168	5
5	4	2	951.195	5
5	4	2	934.502	4
5	4	2	851.171	4
5	4	2	901.257	5
5	4	2	884.337	5
5	4	2	934.482	5
5	4	2	884.544	5
5	4	2	1118.16	5
5	4	2		4
5	4	2	1017.93	5
5	4	2	1251.54	5
5	4	2	1368.2	5
5	4	2	967.77	5
5	4	2	1067.77	4
5	4	1	934.322	3
5	4	1	1067.97	4
5	4	1	1017.81	5
5	4	1	1234.59	4
5	4	1	967.947	5
5	4	1	951.059	4
5	4	1	1351.46	4
5	4	1	917.721	5
5	4	1	1017.84	5
5	4	1	1151.3	5
5	4	1	1134.68	5
5	4	1	867.636	5
5	4	1	1268.12	5
5	4	1	984.632	5
5	4	1	934.73	4
5	4	1	984.466	5
5	4	1	884.362	4
5	4	1	968.063	5
5	4	1	1117.94	4
5	4	1	1351.37	5
6	1	2	1468.41	4
6	1	2	1284.53	5
6	1	2	1167.97	4
6	1	2	1318.19	4
6	1	2	1434.96	4
6	1	2	1334.72	5
6	1	2	1034.52	5
6	1	2		3
6	1	2	1084.67	5
6	1	2	1268.03	5
6	1	2	1468.43	5
6	1	2	951.149	5
6	1	2	1101.27	5
6	1	2	917.997	5
6	1	2	1251.41	5
6	1	2		4
6	1	2	1334.87	2
6	1	2	1334.96	5
6	1	2	1418.3	4
6	1	2	1017.79	5
6	1	1	2001.99	2
6	1	1		4
6	1	1	1318.37	5
6	1	1	1051.19	5
6	1	1	984.683	5
6	1	1	1651.67	4
6	1	1		3
6	1	1		4
6	1	1	2185.4	5
6	1	1		4
6	1	1		5
6	1	1	1101.25	5
6	1	1	717.472	4
6	1	1	1017.93	5
6	1	1	2252.18	4
6	1	1		4
6	1	1	1384.91	5
6	1	1		2
6	1	1	1334.71	5
6	1	1	1785.05	5
6	1	3	934.201	5
6	1	3	1335.12	5
6	1	3		4
6	1	3	1318.08	5
6	1	3	850.612	4
6	1	3		5
6	1	3	1284.8	5
6	1	3	1301.88	4
6	1	3	1051.31	5
6	1	3		4
6	1	3	2669.34	5
6	1	3	1301.55	5
6	1	3	1201.48	5
6	1	3	1134.79	5
6	1	3	1068.13	5
6	1	3	1668.53	5
6	1	3	1084.72	5
6	1	3	1017.74	5
6	1	3	917.725	4
6	1	3	1151.41	5
6	1	4	933.392	5
6	1	4	1017.97	5
6	1	4	1318.19	5
6	1	4	1101.36	5
6	1	4		5
6	1	4	1651.69	4
6	1	4	1218.04	5
6	1	4	1218.21	4
6	1	4	1151.42	5
6	1	4	1418.34	5
6	1	4	1601.87	5
6	1	4	1067.8	5
6	1	4	901.191	5
6	1	4	867.756	4
6	1	4	917.584	5
6	1	4	1118.15	5
6	1	4	951.198	5
6	1	4	917.814	5
6	1	4	1034.54	5
6	1	4	1318.15	4
6	2	1	1084.64	5
6	2	1	1017.86	5
6	2	1	1801.86	5
6	2	1	1134.65	5
6	2	1	1284.79	4
6	2	1		3
6	2	1		4
6	2	1	1334.87	4
6	2	1	951.407	4
6	2	1	1017.85	3
6	2	1	1201.46	5
6	2	1	1418.34	2
6	2	1	1285.07	5
6	2	1	1118.09	5
6	2	1	1301.43	4
6	2	1		4
6	2	1	1134.54	4
6	2	1		2
6	2	1	1534.95	4
6	2	1	1251.55	5
6	2	4	1084.65	5
6	2	4	884.604	5
6	2	4	1318.15	5
6	2	4	1001.28	5
6	2	4	1084.68	5
6	2	4	984.534	4
6	2	4	968.094	5
6	2	4	1218.01	5
6	2	4	917.769	5
6	2	4	934.272	5
6	2	4	1234.69	5
6	2	4	1051.26	5
6	2	4	1017.74	5
6	2	4	1017.99	5
6	2	4	1084.64	5
6	2	4	1184.75	5
6	2	4	1101.45	5
6	2	4	967.788	5
6	2	4	950.998	4
6	2	4	917.863	5
6	2	3	934.517	5
6	2	3	1001.23	5
6	2	3	901.183	4
6	2	3	1051.19	5
6	2	3	1051.19	5
6	2	3		4
6	2	3	1067.89	5
6	2	3	1034.58	5
6	2	3	1251.49	5
6	2	3	1184.64	4
6	2	3	834.235	5
6	2	3	1051.15	5
6	2	3	1168.16	4
6	2	3	1168.09	5
6	2	3	1051.2	5
6	2	3	1117.93	5
6	2	3	867.573	5
6	2	3	934.251	5
6	2	3	1051.33	5
6	2	3	1168.12	5
6	2	2	867.841	4
6	2	2	1184.87	5
6	2	2	967.811	5
6	2	2	1001.11	5
6	2	2	817.67	5
6	2	2	1051.24	5
6	2	2	1284.78	4
6	2	2	1017.94	4
6	2	2	834.214	5
6	2	2	1535.04	5
6	2	2	1201.25	5
6	2	2	850.893	5
6	2	2	1101.32	5
6	2	2	800.895	4
6	2	2	884.524	3
6	2	2	1084.59	5
6	2	2	1251.48	5
6	2	2	1184.75	3
6	2	2	1101.37	4
6	2	2	2152.11	5
6	3	1	1167.99	4
6	3	1	1101.37	3
6	3	1	900.989	4
6	3	1	1084.63	5
6	3	1	834.2	5
6	3	1	1401.54	4
6	3	1		3
6	3	1	1284.93	4
6	3	1	1151.27	5
6	3	1	1101.31	4
6	3	1	1051.11	5
6	3	1	1201.55	4
6	3	1	951.229	5
6	3	1	1101.38	5
6	3	1	1218.05	4
6	3	1	901.225	5
6	3	1	1017.83	4
6	3	1	784.245	4
6	3	1	1084.61	4
6	3	1	1534.88	5
6	3	2	1001.21	4
6	3	2	1151.27	5
6	3	2	1068.02	5
6	3	2	917.709	4
6	3	2	901.001	5
6	3	2	1284.76	5
6	3	2		4
6	3	2	1134.69	4
6	3	2	767.493	5
6	3	2	817.623	5
6	3	2	968.021	5
6	3	2	1001.19	5
6	3	2	917.87	4
6	3	2	1001.25	4
6	3	2	1334.91	5
6	3	2	1101.33	4
6	3	2	1601.45	5
6	3	2	1084.5	4
6	3	2	1601.85	5
6	3	2		5
6	3	4	951.161	5
6	3	4	1284.81	4
6	3	4	917.883	5
6	3	4	934.549	5
6	3	4	851.046	5
6	3	4	1001.26	5
6	3	4	750.796	5
6	3	4	1368.16	5
6	3	4	1117.96	5
6	3	4	934.389	5
6	3	4	900.987	5
6	3	4	784.352	5
6	3	4	1051.27	5
6	3	4	1218.1	5
6	3	4	1034.52	5
6	3	4	750.831	4
6	3	4	833.909	5
6	3	4	917.685	5
6	3	4	901.101	5
6	3	4	817.588	5
6	3	3	750.791	5
6	3	3	750.801	5
6	3	3	901.026	5
6	3	3	1568.25	5
6	3	3	934.444	5
6	3	3	717.469	5
6	3	3	1001.24	5
6	3	3	984.51	5
6	3	3	884.311	5
6	3	3	751.127	5
6	3	3	750.863	5
6	3	3	901.05	5
6	3	3	917.761	5
6	3	3	617.428	5
6	3	3	767.697	5
6	3	3	1067.95	5
6	3	3	867.913	5
6	3	3		4
6	3	3	650.906	5
6	3	3	801.053	4
6	4	3	867.862	5
6	4	3	917.689	4
6	4	3	900.759	5
6	4	3	951.22	5
6	4	3	967.781	5
6	4	3	934.341	4
6	4	3	1001.15	5
6	4	3	817.692	5
6	4	3	734.206	5
6	4	3	717.587	5
6	4	3	951.396	5
6	4	3	951.064	5
6	4	3	701.152	5
6	4	3	951.221	5
6	4	3	867.646	5
6	4	3	1218	5
6	4	3	800.903	5
6	4	3	917.727	5
6	4	3	1117.96	4
6	4	3	734.252	5
6	4	4	650.756	4
6	4	4	1118	5
6	4	4	750.862	5
6	4	4	784.254	5
6	4	4	717.489	4
6	4	4	901.054	5
6	4	4	850.951	5
6	4	4	817.596	5
6	4	4	951.165	5
6	4	4	884.354	5
6	4	4	917.647	5
6	4	4	884.193	5
6	4	4	1001.25	5
6	4	4	734.198	5
6	4	4	867.72	4
6	4	4	967.677	5
6	4	4	634.141	5
6	4	4	817.567	5
6	4	4	834.495	5
6	4	4	901.313	5
6	4	2	951.075	5
6	4	2	951.167	5
6	4	2	867.734	5
6	4	2	867.708	5
6	4	2	1134.71	5
6	4	2	834.398	5
6	4	2	750.994	5
6	4	2	1818.47	3
6	4	2	934.409	5
6	4	2	984.219	5
6	4	2	1034.59	4
6	4	2	901.197	5
6	4	2	1017.76	5
6	4	2	884.398	5
6	4	2	1001.01	5
6	4	2	734.131	5
6	4	2		4
6	4	2	984.47	5
6	4	2	734.142	5
6	4	2	667.467	5
6	4	1	1017.68	5
6	4	1	767.512	4
6	4	1	1034.59	5
6	4	1		3
6	4	1		5
6	4	1	1001.19	5
6	4	1	1134.68	5
6	4	1	901.089	4
6	4	1	951.102	4
6	4	1	1351.76	4
6	4	1	867.598	5
6	4	1	834.288	4
6	4	1	1101.35	5
6	4	1	1251.37	4
6	4	1	767.58	5
6	4	1	917.81	5
6	4	1	834.234	4
6	4	1	1535.02	5
6	4	1	1201.45	5
6	4	1	1001.17	5
7	1	1		5
7	1	1	1468.41	4
7	1	1		2
7	1	1	1551.66	5
7	1	1	1251.47	3
7	1	1	2552.45	4
7	1	1	951.282	4
7	1	1	1568.38	2
7	1	1	1167.96	5
7	1	1	1184.59	5
7	1	1	2135.3	4
7	1	1	1051.39	4
7	1	1		0
7	1	1	1318.19	5
7	1	1	1151.33	5
7	1	1	1551.41	3
7	1	1		0
7	1	1		4
7	1	1		2
7	1	1	1184.71	3
7	1	4	1184.89	5
7	1	4	1318.1	4
7	1	4	1251.43	4
7	1	4	1184.43	5
7	1	4	1651.79	5
7	1	4	951.241	5
7	1	4	1318.11	5
7	1	4	1051.29	2
7	1	4	1001.24	5
7	1	4		2
7	1	4	1217.8	4
7	1	4	1151.31	4
7	1	4	1051.25	5
7	1	4	1051.29	5
7	1	4	1034.63	5
7	1	4		2
7	1	4	1184.75	4
7	1	4	1167.99	5
7	1	4	1034.39	5
7	1	4	934.374	4
7	1	3	1151.18	5
7	1	3	1084.65	5
7	1	3	1268.23	5
7	1	3	984.506	4
7	1	3	1034.62	4
7	1	3	1151.5	4
7	1	3	1468.3	4
7	1	3	1434.95	5
7	1	3	934.422	5
7	1	3	1118.05	4
7	1	3	1050.89	5
7	1	3	851.09	5
7	1	3		4
7	1	3	917.646	5
7	1	3	1001.3	5
7	1	3	1084.7	4
7	1	3	1084.66	4
7	1	3	1685.09	5
7	1	3		3
7	1	3	1101.45	4
7	1	2	917.819	5
7	1	2	901.175	4
7	1	2	1068.02	5
7	1	2	1435.01	5
7	1	2	1017.65	4
7	1	2	1034.54	5
7	1	2		3
7	1	2	1101.37	4
7	1	2	1434.8	1
7	1	2	884.41	5
7	1	2	1034.55	4
7	1	2	834.425	5
7	1	2	951.163	5
7	1	2	1268.16	5
7	1	2		2
7	1	2	917.678	4
7	1	2		3
7	1	2	917.716	3
7	1	2	1318.25	5
[truncated: 4,401 more rows]
