# Supplementary material for: Reduced Listening Effort with Adaptive Binaural Beamforming in Realistic Noisy Environments
Source: Preprints.org preprint supplement (doi:10.20944/preprints202410.2287.v1), 2024-10-29
Supplement: Supplementary file 1 [file supplementary]

# Reduced listening effort with adaptive binaural beamforming in realistic noisy environments

## *Supplementary material*

Joaquin T. Valderrama<sup>1,2,3,4,\*</sup>, Jorge Mejia<sup>4,5</sup>, Angela Wong<sup>4</sup>, Nicholas C. Herbert<sup>6</sup>, Brent Edwards<sup>3,4</sup>

<sup>1</sup>*University of Granada, Department of Signal Theory, Telematics and Communications, Granada, 18014, Spain*

<sup>2</sup>*University of Granada, Research Centre for Information and Communications Technologies, Granada, 18014, Spain*

<sup>3</sup>*Macquarie University, Department of Linguistics, Sydney, NSW 2109, Australia*

<sup>4</sup>*National Acoustic Laboratories, Sydney, NSW 2109, Australia*

<sup>5</sup>*Macquarie University, School of Computing, NSW 2109, Australia*

<sup>6</sup>*Research & Development, Sonova AG, Stäfa, 8712, Switzerland*

*\*Corresponding author: jvalderrama@ugr.es*

## Contents

|          |                                                                                      |           |
|----------|--------------------------------------------------------------------------------------|-----------|
| <b>1</b> | <b>Participants</b>                                                                  | <b>2</b>  |
| <b>2</b> | <b>SNRs corresponding to 80% and 95% intelligibility</b>                             | <b>4</b>  |
| 2.1      | Speech reception threshold (SRT) estimation . . . . .                                | 4         |
| 2.2      | SRT results . . . . .                                                                | 5         |
| <b>3</b> | <b>Dual-task instructions</b>                                                        | <b>7</b>  |
| <b>4</b> | <b>Acoustic measures</b>                                                             | <b>9</b>  |
| 4.1      | Directionality . . . . .                                                             | 9         |
| 4.1.1    | Methods . . . . .                                                                    | 9         |
| 4.1.2    | Results . . . . .                                                                    | 10        |
| 4.2      | SNR advantage . . . . .                                                              | 10        |
| 4.2.1    | Methods . . . . .                                                                    | 10        |
| 4.2.2    | Results . . . . .                                                                    | 11        |
| <b>5</b> | <b>MATLAB script that processes the EEG files from a selected participant</b>        | <b>12</b> |
| <b>6</b> | <b>MATLAB script that performs a cluster-based permutational test on alpha power</b> | <b>19</b> |
| <b>7</b> | <b>Assigned colours to each participant in Figures 3, 4 and 5</b>                    | <b>22</b> |
| <b>8</b> | <b>Individual spectrograms</b>                                                       | <b>23</b> |

# 1 Participants

Table 1 presents the individual characteristics of the participants, including their age, gender, first language, left and right 4-frequency average hearing loss (L-4FA, R-4FA, respectively, i.e.), years of hearing aid use, and their score on the Montreal Cognitive Assessment (MoCA)[Nasreddine et al., 2005] test. Table 2 presents the air-conduction pure-tone audiometric thresholds of each participant for frequencies ranging from 250 to 8000 Hz. These thresholds are also depicted in Figure 1.

| ID  | Gender | Age   | First language | L-4FA | R-4FA | Years of hearing aid use | MoCA |
|-----|--------|-------|----------------|-------|-------|--------------------------|------|
| P01 | Male   | 26.06 | English        | 53    | 53    | 22                       | 87%  |
| P02 | Male   | 74.19 | English        | 51    | 49    | 6                        | 87%  |
| P03 | Male   | 75.68 | English        | 52    | 55    | 7                        | 97%  |
| P04 | Male   | 79.41 | English        | 73    | 67    | 30                       | 93%  |
| P05 | Male   | 33.98 | English        | 54    | 56    | 8                        | 90%  |
| P06 | Male   | 66.50 | English        | 64    | 61    | 20                       | 97%  |
| P07 | Female | 79.86 | English        | 44    | 49    | 10                       | 93%  |
| P08 | Female | 71.74 | English        | 60    | 56    | 20                       | 97%  |
| P09 | Male   | 75.67 | English        | 40    | 38    | 10                       | 93%  |
| P10 | Female | 19.61 | English        | 61    | 63    | 18                       | 90%  |
| P11 | Male   | 81.35 | English        | 49    | 56    | 12                       | 93%  |
| P12 | Male   | 74.20 | English        | 57    | 56    | 7                        | 100% |
| P13 | Female | 77.42 | English        | 52    | 51    | 7                        | 100% |
| P14 | Female | 77.73 | English        | 46    | 39    | 3                        | 93%  |
| P15 | Male   | 80.15 | English        | 52    | 49    | 6                        | 77%  |
| P16 | Female | 80.51 | English        | 52    | 50    | 3                        | 97%  |
| P17 | Female | 81.26 | English        | 47    | 50    | 20                       | 80%  |
| P18 | Male   | 73.88 | English        | 57    | 54    | 10                       | 77%  |
| P19 | Female | 75.60 | English        | 55    | 48    | 5                        | 100% |
| P20 | Female | 75.17 | English        | 69    | 73    | 10                       | 93%  |

Table 1: Individual characteristics of the participants. L- and R-4FA: left and right 4-frequency average hearing loss, respectively (500, 1000, 2000, 4000 Hz). MoCA: Montreal Cognitive Assessment.

| ID  | L-250 | L-500 | L-1000 | L-2000 | L-3000 | L-4000 | L-6000 | L-8000 | R-250 | R-500 | R-1000 | R-2000 | R-3000 | R-4000 | R-6000 | R-8000 | L-4FA | R-4FA |
|-----|-------|-------|--------|--------|--------|--------|--------|--------|-------|-------|--------|--------|--------|--------|--------|--------|-------|-------|
| P01 | 35    | 35    | 50     | 60     | 60     | 60     | 55     | 40     | 35    | 35    | 50     | 60     | 60     | 60     | 50     | 40     | 53    | 53    |
| P02 | 40    | 45    | 45     | 50     | 55     | 60     | 60     | 55     | 45    | 45    | 45     | 45     | 60     | 50     | 35     | 35     | 51    | 49    |
| P03 | 20    | 40    | 55     | 50     | 50     | 65     | 60     | 60     | 20    | 35    | 50     | 60     | 65     | 65     | 70     | 65     | 52    | 55    |
| P04 | 65    | 50    | 65     | 80     | 75     | 95     | 100    | 95     | 70    | 45    | 65     | 75     | 65     | 85     | 85     | 70     | 73    | 67    |
| P05 | 30    | 35    | 50     | 65     | 60     | 60     | 55     | 50     | 30    | 35    | 50     | 65     | 65     | 65     | 60     | 50     | 54    | 56    |
| P06 | 45    | 50    | 60     | 70     | 70     | 70     | 70     | 65     | 40    | 50    | 60     | 65     | 65     | 65     | 65     | 65     | 64    | 61    |
| P07 | 25    | 40    | 40     | 45     | 45     | 50     | 60     | 60     | 35    | 40    | 45     | 55     | 45     | 60     | 60     | 65     | 44    | 49    |
| P08 | 50    | 60    | 65     | 55     | 55     | 65     | 70     | 70     | 45    | 50    | 65     | 55     | 50     | 60     | 65     | 60     | 60    | 56    |
| P09 | 25    | 35    | 35     | 35     | 45     | 50     | 65     | 70     | 25    | 35    | 30     | 40     | 35     | 50     | 60     | 75     | 40    | 38    |
| P10 | 50    | 50    | 55     | 65     | 65     | 70     | 70     | 75     | 50    | 50    | 60     | 60     | 70     | 75     | 75     | 75     | 61    | 63    |
| P11 | 45    | 45    | 50     | 50     | 50     | 50     | 50     | 65     | 45    | 45    | 55     | 60     | 60     | 60     | 60     | 75     | 49    | 56    |
| P12 | 40    | 40    | 45     | 65     | 65     | 70     | 80     | 90     | 40    | 40    | 45     | 60     | 65     | 70     | 85     | 85     | 57    | 56    |
| P13 | 45    | 50    | 45     | 50     | 60     | 55     | 80     | 60     | 35    | 45    | 45     | 55     | 55     | 55     | 75     | 60     | 52    | 51    |
| P14 | 20    | 35    | 45     | 45     | 50     | 55     | 60     | 55     | 15    | 30    | 40     | 35     | 45     | 45     | 60     | 50     | 46    | 39    |
| P15 | 35    | 50    | 55     | 45     | 50     | 60     | 60     | 75     | 40    | 50    | 45     | 35     | 50     | 65     | 70     | 75     | 52    | 49    |
| P16 | 15    | 35    | 50     | 60     | 55     | 60     | 70     | 65     | 10    | 30    | 45     | 55     | 55     | 65     | 65     | 60     | 52    | 50    |
| P17 | 15    | 35    | 45     | 55     | 45     | 55     | 70     | 90     | 10    | 35    | 50     | 60     | 50     | 55     | 70     | 85     | 47    | 50    |
| P18 | 40    | 40    | 55     | 70     | 60     | 60     | 80     | 80     | 30    | 35    | 55     | 60     | 60     | 60     | 65     | 65     | 57    | 54    |
| P19 | 55    | 50    | 50     | 50     | 60     | 65     | 75     | 70     | 45    | 40    | 40     | 45     | 55     | 60     | 70     | 80     | 55    | 48    |
| P20 | 30    | 50    | 65     | 75     | 75     | 80     | 65     | 60     | 40    | 55    | 65     | 80     | 85     | 80     | 75     | 70     | 69    | 73    |

Table 2: Individual air-conduction pure-tone audiometric thresholds for frequencies ranging from 250 to 8000 Hz in the left (L) and right (R) ears.

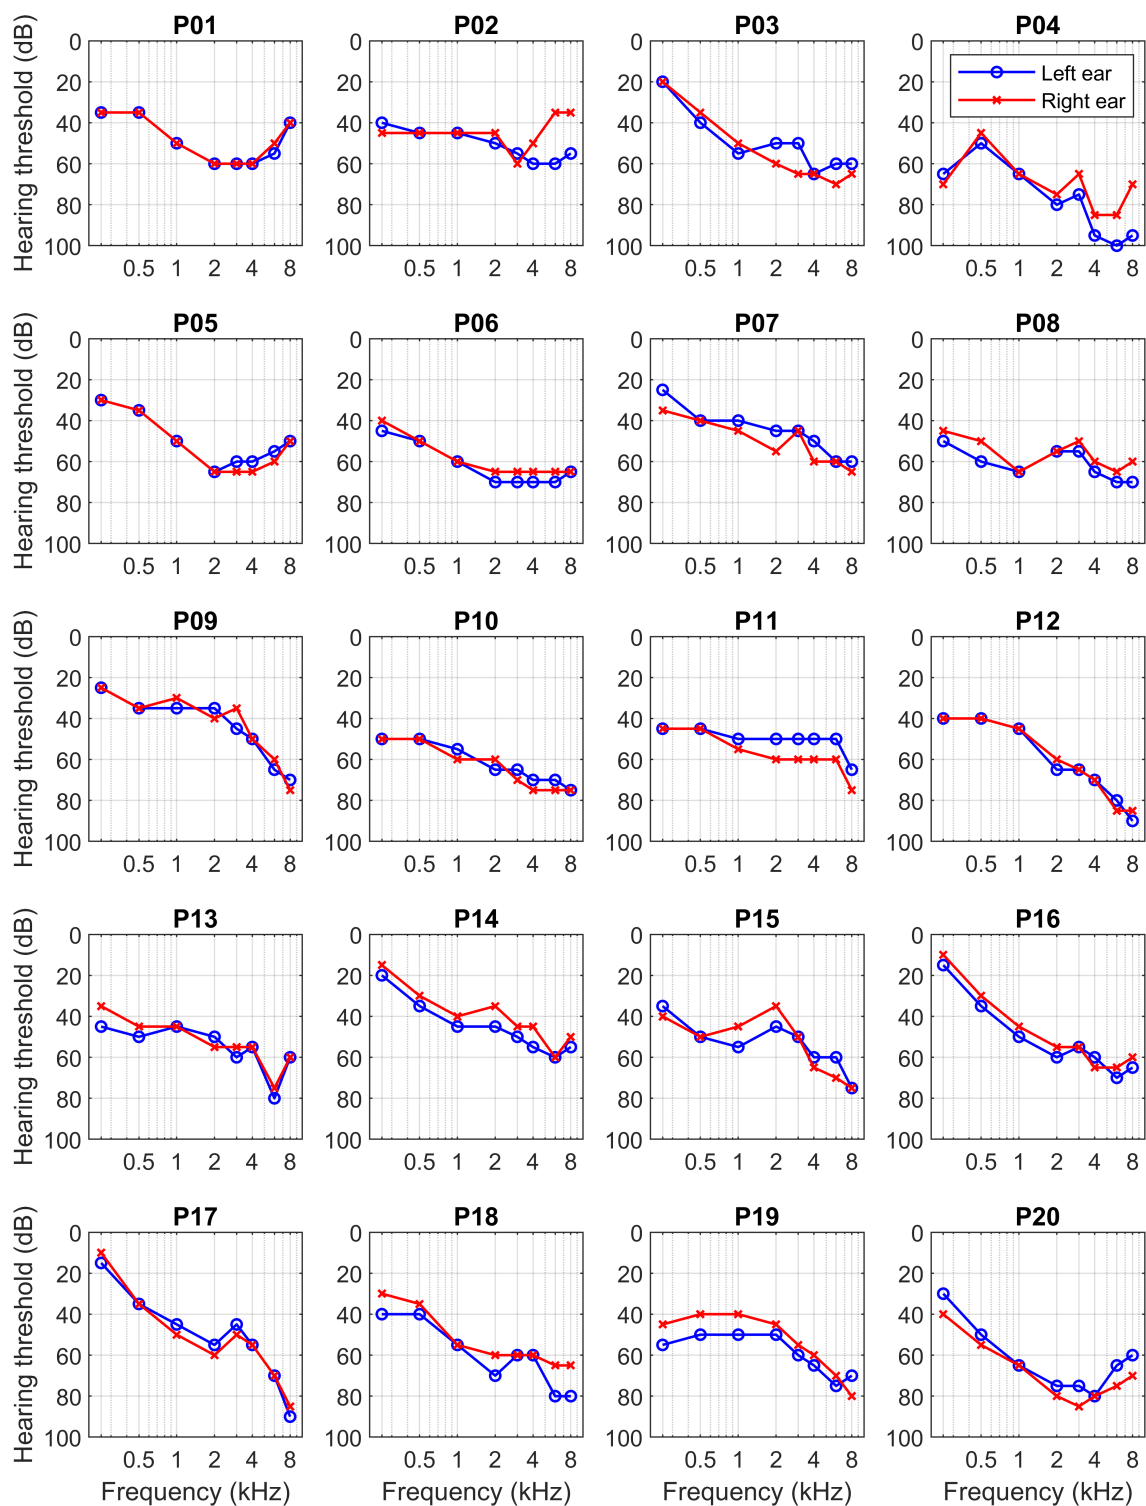

Figure 1: Individual air-conduction pure-tone audiometric thresholds for each participant.

## 2 SNRs corresponding to 80% and 95% intelligibility

### 2.1 Speech reception threshold (SRT) estimation

A custom-made MATLAB script (The Mathworks Inc., Natick, MA) was developed to estimate the signal-to-noise ratios (SNRs) required for correctly understanding 50%, 80%, and 95% of the words, known as speech-reception thresholds (SRT) SRT-50, SRT-80, and SRT-95, respectively. Participants were aided with hearing aids set up in Q-Omni program. Figure 2 displays the program's front-end, showing result estimates for participant #P01. The process involved (i) presenting sentences from the Australian version of the Matrix test[Kelly et al., 2017] with realistic background cafeteria noise and two additional distractors, and (ii) marking the correctly identified words. The background noise level was fixed at around 70 dB sound pressure level (SPL), while the target speech level varied to assess the percentage of correct words across a wide range of SNRs. Four sentences were presented at each SNR, ranging from +15 dB to -15 dB in 3 dB steps. Blue circles in Figure 2 represent the percentage of correctly identified words at each SNR. Since each sentences contains 5 words, percentages are reported in increments of 20%. At the end of the test, a sigmoidal curve is fitted to the data, and the SRT-50, SRT-80, and SRT-95 are estimated from this fitted curve.

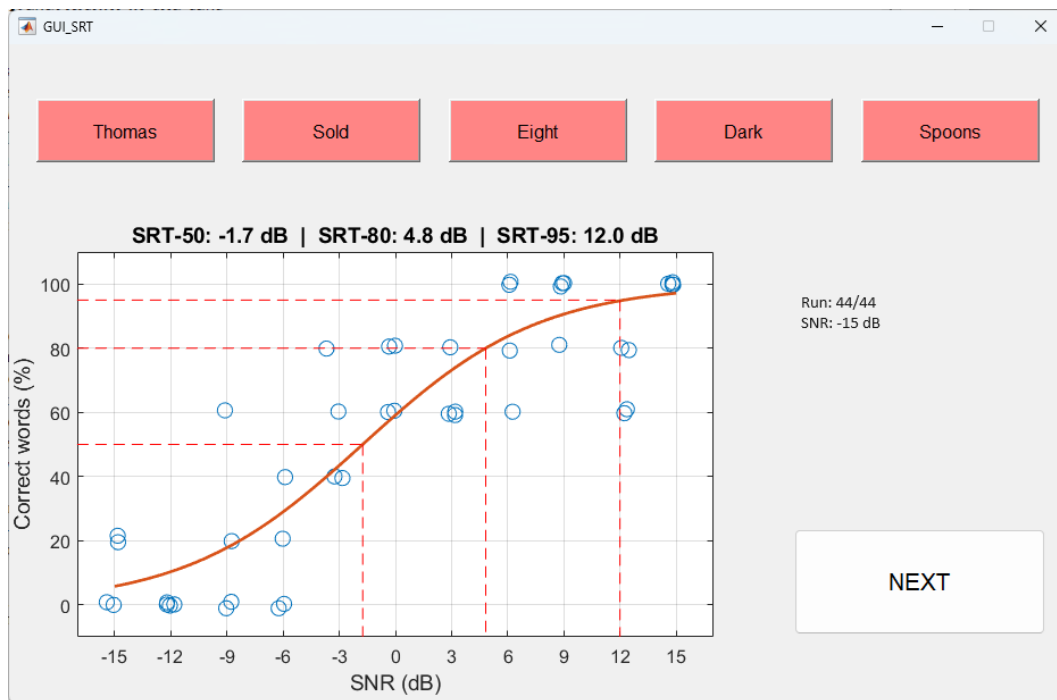

Figure 2: Front end of the custom-made MATLAB program designed to estimate the SRT-50, SRT-80, and SRT-95.

The specific **instructions to the participants** to conduct this part of the test are provided below.

In this test you will be asked to repeat back sentences presented in cafeteria noise. For example:

Peter wants three old desks

The level of the noise will always be the same but the level of the sentences will change. There are 48 sentences in total and your task is to repeat each sentence after you hear it. If you only hear part of the sentence, please just repeat what you have heard. If you are unsure about a particular word/s but think you know what it was you may take a guess.

The test is designed to be very challenging in places so please don't worry or feel frustrated if you do not understand all the words of a sentence. Just do the best you can.



## 2.2 SRT results

Table 3 shows the SNR (in dB) corresponding to each participant's SRT at 80% and 95% intelligibility (SRT-80 and SRT-95). For participants P04, P10, P12, and P19, who did not achieve 80% or 95% intelligibility, the SNR was set at +8 dB for SRT-80 and +12 dB for SRT-95. On average, the SRT-80 and SRT-95 across all participants were +0.1 dB and +4.6 dB, respectively. Figure 3 presents the fitted curves for intelligibility scores over an SNR range of -15 dB to +15 dB, along with individual SRT estimates for each participant.

|        | <b>P01</b> | <b>P02</b> | <b>P03</b> | <b>P04</b> | <b>P05</b> | <b>P06</b> | <b>P07</b> | <b>P08</b> | <b>P09</b> | <b>P10</b> |
|--------|------------|------------|------------|------------|------------|------------|------------|------------|------------|------------|
| SRT-80 | +4.8       | -1.3       | -5.6       | +8.0       | -3.2       | -1.1       | -5.6       | +2.0       | -2.2       | +6.6       |
| SRT-95 | +12.0      | +1.2       | -2.2       | +12.0      | +0.8       | +3.1       | -2.8       | +6.1       | +3.5       | +12.0      |
|        | <b>P11</b> | <b>P12</b> | <b>P13</b> | <b>P14</b> | <b>P15</b> | <b>P16</b> | <b>P17</b> | <b>P18</b> | <b>P19</b> | <b>P20</b> |
| SRT-80 | -5.9       | +8.0       | -5.2       | -3.6       | +0.4       | +1.7       | -3.8       | +2.6       | +6.0       | -0.7       |
| SRT-95 | -2.5       | +12.0      | -1.7       | +0.8       | +5.1       | +7.4       | +0.5       | +8.1       | +12.0      | +3.5       |

Table 3: Signal-to-noise ratios (in dB) corresponding to each participant's 80% and 95% intelligibility (SRT-80 and SRT-95).

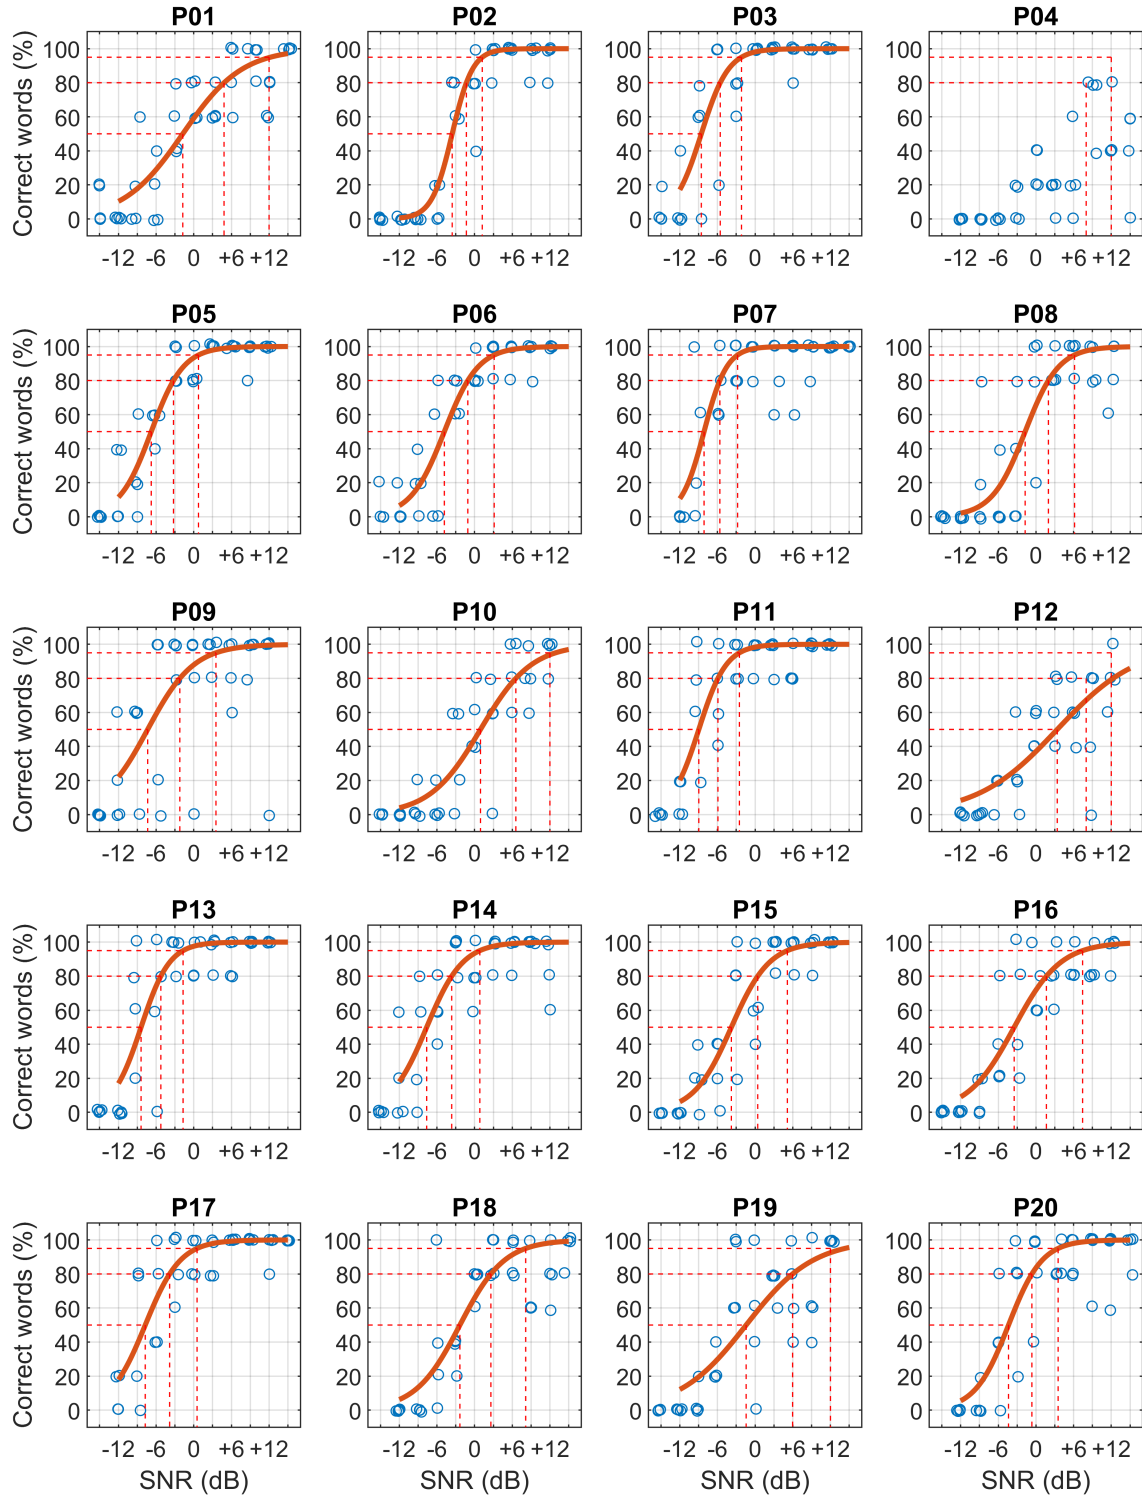

Figure 3: Intelligibility scores over a range of signal-to-noise ratios, and speech-reception threshold estimates for 80% and 95% intelligibility.

### 3 Dual-task instructions

Participants were asked to read the written instructions below on the dual-task methodology, and seek clarification if needed. Once they confirmed their understanding, they were given the document shown in Figure 4 to aid in learning and consolidating the test instructions. The first page of this document included a visual diagram and examples of the instructions. On the second page, participants were asked to mark the correct arrow key to press in 10 different scenarios.

#### INSTRUCTIONS TO PARTICIPANTS

This test measures how much **effort it takes to understand a sentence in noise**. You will be asked to do two tasks simultaneously:

1. The **first task** consists of repeating back a sentence of five words in the presence of realistic cafeteria noise. An example of the sentence is “Peter wants three old desks”.
2. The **second task** is an audio-visual task. In this task, at the onset of the sentence a black circle will appear in any of the two vertical rectangles on the large screen in front of you. Your task is to press the left or right arrow in the keyboard according to the following rule:
  - If the name at the start of a sentence is *MALE*, press the arrow pointing *TOWARDS* the circle.
  - If the name of the person is from a *FEMALE*, press the arrow pointing *AWAY* the circle.

Please follow these guidelines:

- Look straight ahead to the center of the screen;
- use one hand, and leave your fingers just over the arrow buttons along the test so you don’t have to look down;
- always use the same two fingers to press the two arrow buttons;
- press the button as fast as you can but not so fast that it stops from you being accurate;
- keep in your memory the words that you understood; and after the circle disappears, repeat back these words;
- when you feel ready for the next sentence, press any key to continue; and
- try not to feel frustrated if you don’t understand most of the words in a sentence, the test is designed to be quite challenging in some parts.

The figure below illustrates an example corresponding to the example sentence “Peter wants three old desks”. Since the name **Peter** is **male**, and the circle is in the right rectangle, the correct arrow to press is the **right arrow** (the arrow pointing towards the circle).

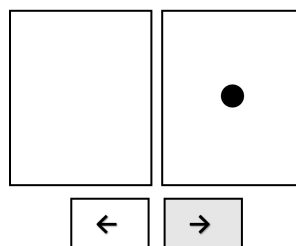

## The only rule to remember

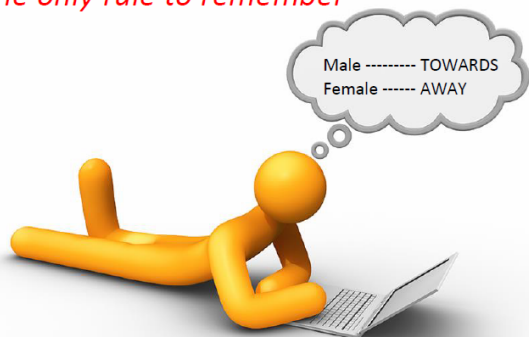

When you hear a **MALE** name, press the arrow pointing **TOWARDS** the circle

Thomas wants nine red toys

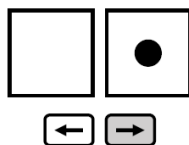

Peter gives three old shoes

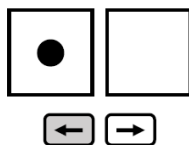

When you hear a **FEMALE** name, press the arrow pointing **AWAY** the circle

Lucy sees some thin mugs

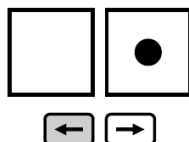

Nina has twelve dark rings

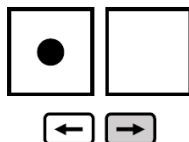

## Test yourself! Mark the correct arrow

Peter got three large desks

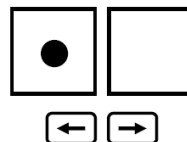

Kathy sees nine small chairs

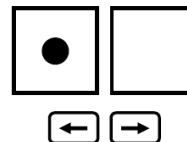

Lucy bought five old shoes

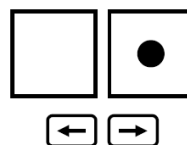

Alan gives eight dark toys

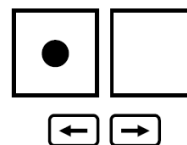

Rachel sold four thin spoons

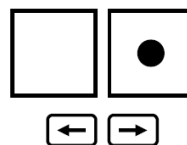

Barry likes six green mugs

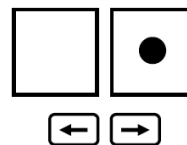

Steven has two cheap ships

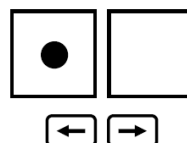

Thomas kept ten pink rings

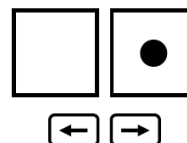

Hannah wins twelve red tins

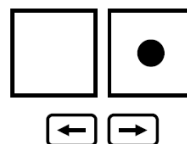

Nina wants some big beds

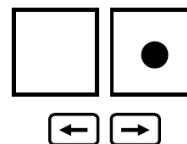

Figure 4: Document page used to learn and practice the dual-task instructions.

## 4 Acoustic measures

This section presents the experiments conducted to characterise the acoustic benefit provided by the *Directional Microphone* (DM) program—designed to enhance speech understanding in environments with high levels of background noise, incorporating an adaptive binaural microphone system providing a highly directional listening beam, relative to *Quasi-Omnidirectional* (Q-Omni)—a program designed to preserve the natural sound quality and spatial awareness using a quasi-omnidirectional microphone strategy that simulates the natural ear’s directionality. These experiments consisted of (i) a directionality study, and (ii) an estimate of the SNR advantage. Results show that compared to Q-Omni, DM provides a benefit of +5.6 dB in the articulation index-weighted directivity index [Killion et al., 1998] (section 4.1), and an articulation index SNR advantage of +4.8 dB [Killion et al., 1998] (section 4.2).

### 4.1 Directionality

#### 4.1.1 Methods

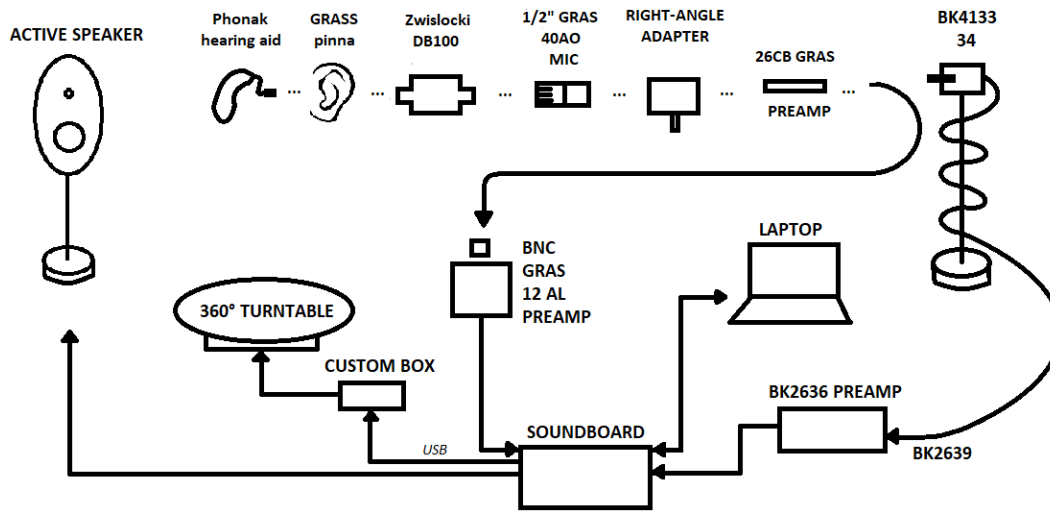

Figure 5: Hardware elements and connections.

Figure 5 shows a diagram with the hardware elements and connections. Phonak Audéo M90-312 hearing aids were fixed to a manikin for hearing aid testing (KEMAR 1974, GRAS Sound & Vibration A/S, Holte, Denmark). The earmolds were placed inside the pinna for KEMAR ([left ear] GRAS KB0066; [right ear] GRAS KB0065). KEMAR was fitted with a DB-100 2cc Zwislocki coupler, connected to a 1/2" GRAS 40AO microphone, which was connected to a 26CB GRAS preamplifier using a right-angle adapter, and then to a GRAS 12AL microphone preamplifier using a BNC cable. The output of the preamplifier was connected to a Multiface II soundcard (RME Audio, Haimhausen, Germany), which was connected to a laptop via an HDSP Cardbus card. KEMAR was placed on a chair, situated at the centre of a BK-3922 turntable, which was controlled by a MATLAB script (The Mathworks Inc., Natick, MA) and custom-made hardware. A speaker was placed at 2 meters from KEMAR, at the same height as the hearing aids.

Regarding the hearing-aid fitting, M receivers were used with an occluded cShell earpiece (due to the narrow canal size, SlimTip earmolds, as used in the main experiment, could not be employed). The NAL-NL2 [Keidser et al., 2012] fitting formula at 100% target gain with prescribed compression was used, applying the averaged air-conduction hearing thresholds across all participants of the study as input audiogram. The Q-Omni and DM programs were manually added and all features (besides microphone directionality) were disabled. The directional characteristics of the hearing aids in both programs were evaluated in linear mode, with the compression settings switched *off* [Kates, 2008].

The auditory stimulus consisted of 25 seconds of pink noise presented at 75 dB SPL. In all the measures, the first 20 seconds were allowed for activating the steering and noise reduction features of the hearing aid; and the remaining 5

seconds were used for analysis. The stimulus was presented firstly from a frontal noise source ( $0^\circ$  azimuth), then at  $15^\circ$  azimuth increments for a full  $360^\circ$  rotation. Polar plots were constructed with a  $15^\circ$  precision by applying a  $1/3^{rd}$  octave band filter-bank and then normalising each trace to the direction with maximum level. The plots used in this analysis had centre frequencies of 500 Hz, 2500 Hz, and 5000 Hz. The polar plots obtained from the left and right ears were averaged to form one single plot. Directionality was evaluated via (i) the *directivity index* (DI) – the ratio of the microphone output for sounds coming from  $0^\circ$  azimuth to the average of microphone output for sounds from all other directions in a diffuse field [Beranek, 1954]; and (ii) the *articulation index-weighted directivity index* (AI-DI) – the sum and average of the directivity index at each frequency multiplied by the articulation index weighting of the frequency band for speech intelligibility [Killion et al., 1998].

#### 4.1.2 Results

Figure 6 shows the polar plots obtained at the three evaluated frequency bands. This figure shows that DM provides a higher degree of directionality, particularly in the 2500 Hz center frequency. Table 4 compares the directivity index of Q-Omni and DM at the three evaluated center frequencies. Considering the full frequency spectrum, the difference in AI-DI between DM and Q-Omni was +5.6 dB (i.e. AI-DI was equal to -1.8 dB in Q-Omni and +3.8 dB in DM).

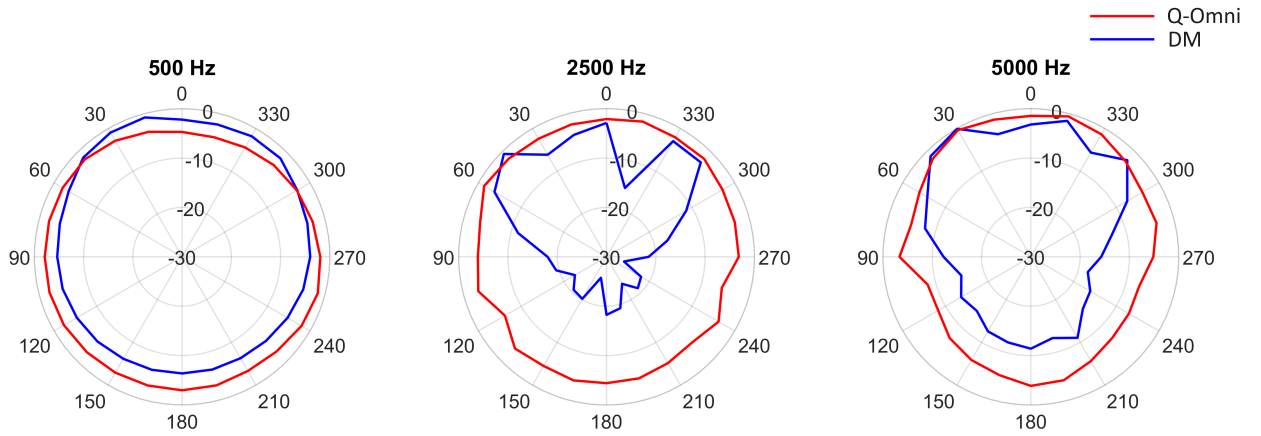

Figure 6: Polar plots at different  $1/3^{rd}$  octave frequencies in ‘Quasi-Omnidirectional’ (Q-Omni) and ‘Directional Microphone’ (DM) programs.

| Center frequency | Q-Omni   | DM       |
|------------------|----------|----------|
| 500 Hz           | -1.81 dB | +0.34 dB |
| 2500 Hz          | +3.81 dB | +5.27 dB |
| 5000 Hz          | +0.46 dB | +3.02 dB |

Table 4: Directivity Index of ‘Quasi-Omnidirectional’ (Q-Omni) and ‘Directional Microphone’ (DM) programs at 500 Hz, 2500 Hz and 5000 Hz.

## 4.2 SNR advantage

### 4.2.1 Methods

The purpose of this experiment was to measure the objective SNR advantage provided by DM relative to Q-Omni at different frequencies. The hardware setup was similar to the one presented in Figure 5. KEMAR hearing aids were fitted as described in section 4.1.1, but this time with compression-*on*.

The acoustic scenario was similar to the material used in the dual-task, described in the ‘Dual task paradigm’ section of the main paper. The auditory stimulus consisted of 50 concatenated words of 0.5 seconds corresponding to the Australian version of the Matrix test [Kelly et al., 2017], presented from the front speaker of the 41-channel Ambisonics array of speakers at 68 dB sound pressure level (SPL). Noise consisted of realistic cafeteria noise from the Ambisonics Recordings of Typical Environments (ARTE) database [Weisser et al., 2019] and two added distractors at  $\pm 67^\circ$  presented at 65 dB SPL (with a combined noise level around 70 dB SPL). The total level of target + noise was around 72 dB SPL.

The SNR benefit between different conditions was estimated according to the methodology described by Hagerman and Olofsson [2004]. This methodology consisted in dividing the auditory stimulus into segments of 6 seconds with some degree of overlapping, and presenting these segments in the following polarities with respect the polarity of the noise: (A) [- -] (i.e., stimulus in negative polarity and noise in negative polarity); (B) [+ -] (i.e., stimulus in positive polarity and noise in negative polarity); and (C) [+ +]. This way: A+B ends up with just the noise; A-B ends up with just the stimulus; B+C ends up with just the stimulus; and B-C ends up with just the noise. The error can be estimated by comparing the two corresponding calculations, i.e., [A+B vs B-C] for the noise and [A-B vs B+C] for the stimulus. The first 20 seconds of auditory stimulation were discarded from the analysis in order to allow for adaptation of the hearing aids. The overall benefit was evaluated via the articulation index SNR benefit [Killion et al., 1998].

#### 4.2.2 Results

Figure 7 shows the SNR advantage of DM relative to Q-Omni at different frequencies. The articulation index – SNR benefit of DM over Q-Omni was estimated as +4.6 dB.

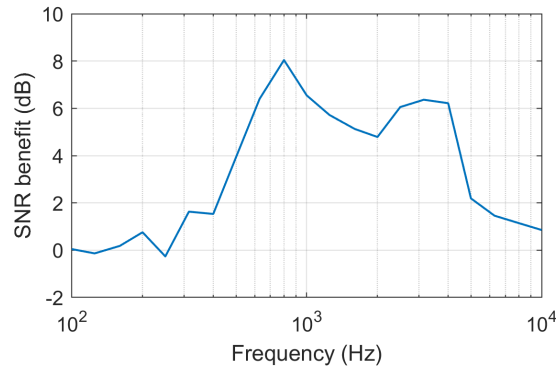

Figure 7: SNR benefit (dB) of ‘Directional Microphone’ (DM) relative to ‘Quasi-Omnidirectional’ (Q-Omni) at different frequencies.

## 5 MATLAB script that processes the EEG files from a selected participant

```
1 %% EEG processing of a selected participant
2 clear,clc
3 addpath('FieldTrip') % Add the FieldTrip directory
4
5 %% Variables initialisation
6 Participant = 1; % Selected participant
7 % TestCond: 1.SRT80-QOmni; 2.SRT80-DM; 3.SRT95-QOmni; 4.SRT95-DM
8 A = load('TestCond'); % Test condition order per participant
9 TestCond = A.TestCond; SBJ = A.SBJ; clear A
10 NTests = 16; % Number of tests per participant
11 NSentences = 20; % Sentences per file
12 Thr_Value = 100; % Threshold for trial rejection in uV
13 Thr_Range = 500:5000; % Time range for artifact rejection
14 L_Window = 9; % Length in seconds of the time window
15 FMax = 30; % Maximum evaluated frequency
16 DEBUG = 0; % Flag to view EEG data
17
18 %% Select Noisy channels and ICA components to reject
19 switch Participant
20 case 1
21     NoisyChans = {'TP7','TP8','FT8','T8'};
22     ICA_ComponentsReject = [12,20,46];
23 case 2
24     NoisyChans = {'T7','PO7','FPZ','FP2'};
25     ICA_ComponentsReject = [1,22,47,59,60];
26 case 3
27     NoisyChans = {};
28     ICA_ComponentsReject = 1;
29 case 4
30     NoisyChans = {'FT8'};
31     ICA_ComponentsReject = [1,3,52,54,58];
32 case 5
33     NoisyChans = {'F3','T7','T8','CP2'};
34     ICA_ComponentsReject = [2,3,4];
35 case 7
36     NoisyChans = {'T7','T8','TP7','F7','O1'};
37     ICA_ComponentsReject = [1,2,3,23,31,37,51,52];
38 case 8
39     NoisyChans = {'F6','P7','TP7'};
40     ICA_ComponentsReject = [2,3,4,5,23];
41 case 9
42     NoisyChans = {'F5','FC5','C6','C5','T8','T7'};
43     ICA_ComponentsReject = [1,2,12,40,58];
44 case 10
45     NoisyChans = {'F6','FC2','FT7','T8','F8'};
46     ICA_ComponentsReject = [1,2,3,27,38,50,54,59];
47 case 11
48     NoisyChans = {'C6','T7','T8','HEO','TP7','FP1'};
```



```

49         ICA_ComponentsReject = [1,2,23,34,36,44,48,51];
50     case 12
51         NoisyChans = {'FP1','F8','T7','O2','FT8','T8'};
52         ICA_ComponentsReject = [1,2,16,50];
53     case 13
54         NoisyChans = {'FPZ','FZ','FC1','C5','C3','CP6','P2','PO4','F6',...
55             'O1','TP8'};
56         ICA_ComponentsReject = [1,2,5,13,23,36,44,50];
57     case 14
58         NoisyChans = {'F4','P8','M2','T8','PO5'};
59         ICA_ComponentsReject = [1,2,3,6,10,19,23,30,42,50];
60     case 15
61         NoisyChans = {'FC2','FC5','F8'};
62         ICA_ComponentsReject = [1,2,6,8,12,13,15,23,37,41];
63     case 16
64         NoisyChans = {'F6','F8','FT7','FC5','FC6','FT8','O1'};
65         ICA_ComponentsReject = [1,4,6,10,13,16,25,30,35,42,44,51,52];
66     case 17
67         NoisyChans = {'FPZ','FC6','C5','CP5'};
68         ICA_ComponentsReject = [1,2,3,6,7,8,11,13,14,15,18,19,23,25,28,...
69             29,30,31,35,36,39,41,42,44,49,50,54,56,58,59];
70     case 18
71         NoisyChans = {'T8'};
72         ICA_ComponentsReject = [1,32,43,48,61];
73     case 19
74         NoisyChans = {'T7','TP8','TP7'};
75         ICA_ComponentsReject = [1,2,3,4,5,24,31,36,45,47,59];
76     case 20
77         NoisyChans = {'T8','FC6','P7','TP7','TP8','T8','O2','OZ','M2'};
78         ICA_ComponentsReject = [1,2,42,44,50,51];
79 end
80
81 %% Segment all files from one participant
82 % Section initialisation
83 Segmented_Data = cell(NTests,1);
84 cfg = [];
85 cfg.method = 'triangulation';
86 cfg.layout = 'EEG1010.lay';
87 neigh = ft_prepare_neighbours(cfg); % Prepare neighbour channels
88
89 for test=1:NTests
90     % LOAD data
91     FileName = ['Database\P0' SBJ(Participant,:) '\test' Idx2Str(test) ...
92         '.cnt'];
93     cfg = [];
94     cfg.dataset = FileName;
95     cfg.channel = {'all','-CB1','-CB2','-EKG','-EMG'};
96     data = ft_preprocessing(cfg);
97     fs = data.fsample;
98

```

```

99 % VIEW data and identify noisy channels by visual inspection
100 if DEBUG
101     cfg = [];
102     cfg.viewmode = 'vertical';
103     cfg.ylim = [-20 20];
104     cfg.blocksize = 9;
105     cfg.preproc.hpfilter = 'yes';
106     cfg.preproc.hpfreq = 1;
107     cfg.channel = 1:64;
108     ft_databrowser(cfg,data)
109 end
110
111 % RE-REFERENCE excluding noisy channels
112 cfg = [];
113 cfg.reref = 'yes';
114 cfg.refchannel = {'all', '-VEO', '-HEO'};
115 for k=1:length(NoisyChans)
116     cfg.refchannel{k+3} = join(['-' NoisyChans{k}]);
117 end
118 data = ft_preprocessing(cfg,data);
119
120 % INTERPOLATION
121 cfg = [];
122 cfg.method = 'nearest';
123 cfg.layout = 'EEG1010.lay';
124 cfg.neighbours = neigh;
125 for k=1:length(NoisyChans)
126     cfg.badchannel = NoisyChans(k);
127     data = ft_channelrepair(cfg,data);
128 end
129
130 % SEGMENTATION
131 % Read triggers
132 Triggers = ft_read_event(FileName);
133 Triggers = ft_filter_event(Triggers,'type','trigger','value',20);
134 Triggers = Triggers(1:NSentences);
135
136 % Segmentation features
137 Triggers = [Triggers.sample]';
138 Prestim = 2.0*fs; Poststim = (L_Window-2.0)*fs;
139 % [1column: start 2column: end 3column: eventstart or offset]
140 Triggers = [Triggers-Prestim Triggers+Poststim ...
141     -Prestim*ones(length(Triggers),1)];
142
143 % Segment data
144 cfg = [];
145 cfg.trl = floor(Triggers);
146 Segmented_Data{test} = ft_redefinetrial(cfg,data);
147 end
148

```

```

149 %% Remove eye blinks using ICA
150 % Combine data from all files - this speeds up ICA
151 data = Segmented_Data{1};
152 SampleInfo = [data.sampleinfo ; nan(300,2)];
153 for k=2:NTests
154     data = ft_appenddata([],data,Segmented_Data{k});
155     SampleInfo((k-1)*NSentences+1:k*NSentences,:) = ...
156         Segmented_Data{k}.sampleinfo;
157 end
158 data.sampleinfo = SampleInfo;
159 clear SampleInfo
160
161 % Triggers adjustment to avoid error in later stages
162 for k=1:NTests
163     data.sampleinfo((k-1)*NSentences+1:k*NSentences,:) = ...
164         data.sampleinfo((k-1)*NSentences+1:k*NSentences, :)+(k-1)*1000000;
165 end
166
167 % Separate independent components using ICA
168 cfg = [];
169 cfg.channel = {'all'};
170 cfg.randomseed = 1; % Set to 1 for replicability
171 cfg.numcomponent = 64-length(NoisyChans); % Number of healthy channels
172 cfg.method = 'runica';
173 data = ft_componentanalysis(cfg,data); % Takes time [around 15 mins]
174
175 % Identify noisy components
176 if DEBUG
177     set(0,'DefaultFigureColormap',feval('jet')); % #ok
178     cfg = [];
179     cfg.layout = 'EEG1010.lay';
180     cfg.viewmode = 'component';
181     ft_databrowser(cfg,data);
182 end
183
184 % Recompose data excluding components identified as blinks and eye movement
185 cfg = [];
186 cfg.component = ICA_ComponentsReject;
187 data = ft_rejectcomponent(cfg,data);
188
189 %% Trials rejection
190 % High-pass filter the data [1 Hz]
191 cfg = [];
192 cfg.hpfilter = 'yes';
193 cfg.hpfreq = 1;
194 data = ft_preprocessing(cfg,data);
195
196 % Section initialisation
197 AcceptedTrials = []; % Accepted trials initialisation
198 cfg = [];

```

```

199 cfg.method = 'nearest';
200 cfg.layout = 'EEG1010.lay';
201 cfg.neighbours = neigh;
202
203 % Interpolate noisy trials if there are <10 noisy trials
204 for k=1:NTests*NSentences
205     Noisychans = 0;
206     for chan=1:62
207         if max(abs(data.trial{k}(chan,Thr_Range)))>Thr_Value
208             % Interpolate noisy sweeps from neighbour channels
209             cfg.trials = k;
210             cfg.badchannel = data.label(chan);
211             tmp = ft_channelrepair(cfg,data);
212             data.trial{k} = tmp.trial{1};
213             Noisychans = Noisychans+1;
214             clear tmp
215         end
216     end
217     if Noisychans<10, AcceptedTrials = [AcceptedTrials k]; end      %#ok
218     clear Noisychans
219 end
220 data.acc = AcceptedTrials;
221 clear AcceptedTrials
222
223 %% Time-Frequency analysis
224 TrialsSRT80_QOmni = nan(1,NTests*NSentences); % SRT80-QOmni
225 TrialsSRT80_DM = nan(1,NTests*NSentences); % SRT80-DM
226 TrialsSRT95_QOmni = nan(1,NTests*NSentences); % SRT95-QOmni
227 TrialsSRT95_DM = nan(1,NTests*NSentences); % SRT95-DM
228 for test=1:NTests
229     for sentence=1:NSentences
230         idx = (test-1)*NSentences+sentence;
231         cond_Acc = ismember(idx,data.acc); % The trial is accepted
232         % The trial is SRT80-QOmni, SRT80-DM, SRT95-QOmni, or SRT95-DM
233         cond_SRT80_QOmni = ismember((floor(idx/NSentences)+1),...
234             find(TestCond(Participant,')==1)); % SRT80-QOmni
235         cond_SRT80_DM = ismember((floor(idx/NSentences)+1),...
236             find(TestCond(Participant,')==2)); % SRT80-DM
237         cond_SRT95_QOmni = ismember((floor(idx/NSentences)+1),...
238             find(TestCond(Participant,')==3)); % SRT95-QOmni
239         cond_SRT95_DM = ismember((floor(idx/NSentences)+1),...
240             find(TestCond(Participant,')==4)); % SRT95-DM
241         % Determine valid Trials in all test conditions
242         TrialsSRT80_QOmni(idx) = cond_Acc & cond_SRT80_QOmni;
243         TrialsSRT80_DM(idx) = cond_Acc & cond_SRT80_DM;
244         TrialsSRT95_QOmni(idx) = cond_Acc & cond_SRT95_QOmni;
245         TrialsSRT95_DM(idx) = cond_Acc & cond_SRT95_DM;
246     end
247 end
248 clear idx cond_Acc cond_SRT80_QOmni

```

```

249 clear cond_SRT80_DM cond_SRT95_QOmni cond_SRT95_DM
250
251 % TF analysis configuration
252 cfg = [];
253 cfg.method = 'wavelet'; % Morlet wavelet
254 cfg.width = 5; % Number of cycles of the wavelet
255 cfg.foilim = [0 FMax]; % Frequency band of interest
256 cfg.toi = -2:0.05:L_Window-2; % Time axis
257 cfg.keeptrials = 'yes'; % Keeps the trials (heavy files)
258 cfg.channel = {'all', '-VEO', '-HEO'}; % Exclude ocular channels
259 cfg.output = 'pow'; % Power spectra
260
261 % TF analysis for SRT-80 QOmni (TestCond = 1)
262 cfg.trials = find(TrialsSRT80_QOmni);
263 data_TFR_SRT80_QOmni = ft_freqanalysis(cfg,data);
264
265 % TF analysis for SRT-80 DM (TestCond = 2)
266 cfg.trials = find(TrialsSRT80_DM);
267 data_TFR_SRT80_DM = ft_freqanalysis(cfg,data);
268
269 % TF analysis for SRT-95 QOmni (TestCond = 3)
270 cfg.trials = find(TrialsSRT95_QOmni);
271 data_TFR_SRT95_QOmni = ft_freqanalysis(cfg,data);
272
273 % TF analysis for SRT-95 DM (TestCond = 4)
274 cfg.trials = find(TrialsSRT95_DM);
275 data_TFR_SRT95_DM = ft_freqanalysis(cfg,data);
276
277 %% Visualise the mean Power spectrum across electrodes
278 figure('PaperSize',[30 20])
279 colormap('jet');
280 cfg = [];
281 cfg.figure = 'gca';
282 cfg.ylim = [0 FMax];
283 cfg.zlim = [0 2000];
284 cfg.layout = 'EEG1010.lay';
285 subplot(2,2,1)
286 ft_singleplotTFR(cfg,data_TFR_SRT80_DM)
287 xlabel('Time (s)')
288 ylabel('Frequency (Hz)')
289 title('SRT-80 [DM]')
290 text(-1.5,FMax+4,['P0' SBJ(Participant,:) ' - Power Spectrum'])
291 subplot(2,2,2)
292 ft_singleplotTFR(cfg,data_TFR_SRT95_DM)
293 xlabel('Time (s)')
294 ylabel('Frequency (Hz)')
295 title('SRT-95 [DM]')
296 subplot(2,2,3)
297 ft_singleplotTFR(cfg,data_TFR_SRT80_QOmni)
298 xlabel('Time (s)')

```

```

299 ylabel('Frequency (Hz)')
300 title('SRT-80 [Q-Omni]')
301 subplot(2,2,4)
302 ft_singleplotTFR(cfg,data_TFR_SRT95_QOmni)
303 xlabel('Time (s)')
304 ylabel('Frequency (Hz)')
305 title('SRT-95 [Q-Omni]')
306 orient tall
307 print('-dpng','-r300',['Figures/' SBJ(Participant,:) '_PowSpec'])
308 close all
309
310 %% Get the Mean Averages (MA)
311 cfg = [];
312 cfg.keeptrials = 'no';
313 cfg.channel = {'all','-VEO','-HEO'};
314 cfg.trials = 'all';
315 cfg.frequency = 'all';
316 cfg.latency = 'all';
317 MA_SRT80_QOmni = ft_freqdescriptives(cfg,data_TFR_SRT80_QOmni);
318 MA_SRT80_DM = ft_freqdescriptives(cfg,data_TFR_SRT80_DM);
319 MA_SRT95_QOmni = ft_freqdescriptives(cfg,data_TFR_SRT95_QOmni);
320 MA_SRT95_DM = ft_freqdescriptives(cfg,data_TFR_SRT95_DM);
321
322 %% Store data
323 save(['Results/P0' SBJ(Participant,:)], 'MA_SRT80_QOmni', 'MA_SRT80_DM', ...
324     'MA_SRT95_QOmni', 'MA_SRT95_DM', 'TrialsSRT80_QOmni', 'TrialsSRT80_DM', ...
325     'TrialsSRT95_QOmni', 'TrialsSRT95_DM')

```

## 6 MATLAB script that performs a cluster-based permutational test on alpha power

```
1 %% Cluster permutation analysis on aggregated data from 19 participants
2 clear,clc
3 addpath('FieldTrip') % Add the FieldTrip directory
4
5 %% Combine individual Mean Averages (MAs)
6 % P06 excluded due to corrupted triggers
7 SBJ = ['01'; '02'; '03'; '04'; '05'; '07'; '08'; '09'; '10'; '11'; '12'; ...
8        '13'; '14'; '15'; '16'; '17'; '18'; '19'; '20'];
9 NSbj = length(SBJ);
10 All_SRT80_QOmni = cell(NSbj,1); % PowSpec SRT-80 Q-Omni
11 All_SRT80_DM = cell(NSbj,1); % PowSpec SRT-80 DM
12 All_SRT95_QOmni = cell(NSbj,1); % PowSpec SRT-95 Q-Omni
13 All_SRT95_DM = cell(NSbj,1); % PowSpec SRT-95 DM
14 for sbj=1:NSbj
15     fprintf(sprintf('Subject %d/%d\n', sbj, NSbj))
16     load(['Results/P0' SBJ(sbj, :)])
17     All_SRT80_QOmni{sbj} = MA_SRT80_QOmni;
18     All_SRT80_DM{sbj} = MA_SRT80_DM;
19     All_SRT95_QOmni{sbj} = MA_SRT95_QOmni;
20     All_SRT95_DM{sbj} = MA_SRT95_DM;
21 end
22
23 %% Grand-averages across subjects
24 cfg = [];
25 cfg.keepindividual = 'yes';
26 cfg.foelim = 'all';
27 cfg.toelim = 'all';
28 cfg.channel = 'all';
29 cfg.parameter = 'powspctrm';
30
31 GA_SRT80_QOmni = ft_freqgrandaverage(cfg, All_SRT80_QOmni{1}, ...
32     All_SRT80_QOmni{2}, All_SRT80_QOmni{3}, All_SRT80_QOmni{4}, ...
33     All_SRT80_QOmni{5}, All_SRT80_QOmni{6}, All_SRT80_QOmni{7}, ...
34     All_SRT80_QOmni{8}, All_SRT80_QOmni{9}, All_SRT80_QOmni{10}, ...
35     All_SRT80_QOmni{11}, All_SRT80_QOmni{12}, All_SRT80_QOmni{13}, ...
36     All_SRT80_QOmni{14}, All_SRT80_QOmni{15}, All_SRT80_QOmni{16}, ...
37     All_SRT80_QOmni{17}, All_SRT80_QOmni{18}, All_SRT80_QOmni{19});
38 GA_SRT80_DM = ft_freqgrandaverage(cfg, All_SRT80_DM{1}, ...
39     All_SRT80_DM{2}, All_SRT80_DM{3}, All_SRT80_DM{4}, ...
40     All_SRT80_DM{5}, All_SRT80_DM{6}, All_SRT80_DM{7}, ...
41     All_SRT80_DM{8}, All_SRT80_DM{9}, All_SRT80_DM{10}, ...
42     All_SRT80_DM{11}, All_SRT80_DM{12}, All_SRT80_DM{13}, ...
43     All_SRT80_DM{14}, All_SRT80_DM{15}, All_SRT80_DM{16}, ...
44     All_SRT80_DM{17}, All_SRT80_DM{18}, All_SRT80_DM{19});
45 GA_SRT95_QOmni = ft_freqgrandaverage(cfg, All_SRT95_QOmni{1}, ...
46     All_SRT95_QOmni{2}, All_SRT95_QOmni{3}, All_SRT95_QOmni{4}, ...
47     All_SRT95_QOmni{5}, All_SRT95_QOmni{6}, All_SRT95_QOmni{7}, ...
48     All_SRT95_QOmni{8}, All_SRT95_QOmni{9}, All_SRT95_QOmni{10}, ...
```

```

49 All_SRT95_QOmni{11},All_SRT95_QOmni{12},All_SRT95_QOmni{13},...
50 All_SRT95_QOmni{14},All_SRT95_QOmni{15},All_SRT95_QOmni{16},...
51 All_SRT95_QOmni{17},All_SRT95_QOmni{18},All_SRT95_QOmni{19});
52 GA_SRT95_DM = ft_freqgrandaverage(cfg,All_SRT95_DM{1},...
53 All_SRT95_DM{2},All_SRT95_DM{3},All_SRT95_DM{4},...
54 All_SRT95_DM{5},All_SRT95_DM{6},All_SRT95_DM{7},...
55 All_SRT95_DM{8},All_SRT95_DM{9},All_SRT95_DM{10},...
56 All_SRT95_DM{11},All_SRT95_DM{12},All_SRT95_DM{13},...
57 All_SRT95_DM{14},All_SRT95_DM{15},All_SRT95_DM{16},...
58 All_SRT95_DM{17},All_SRT95_DM{18},All_SRT95_DM{19});
59
60 %% Cluster analysis
61 % Neighbour channels
62 cfg = [];
63 cfg.layout = 'EEG1010.lay';
64 lay = ft_prepare_layout(cfg);
65 cfg.layout = lay;
66 cfg.method = 'triangulation';
67 neigh = ft_prepare_neighbours(cfg); % Prepare neighbour channels
68
69 % Cluster Permutation Analysis (configuration)
70 cfg = [];
71 cfg.layout = 'EEG1010.lay';
72 cfg.neighbours = neigh;
73 cfg.minnbchan = 2; % Min number of chans per cluster
74 cfg.frequency = [8.0 12.0]; % Alpha frequency range
75 cfg.channel = {'all'}; % Channels
76 cfg.parameter = 'powspectrm'; % Analysis on the power spectrum
77 cfg.avgovertime = 'yes'; % We average over the time domain
78 cfg.avgoverfreq = 'yes'; % We average over the freq domain
79 cfg.avgoverchan = 'no'; % We keep separated info on chans
80 cfg.statistic = 'ft_statfun_depsamplesT'; % Paired test
81 cfg.numrandomization = 'all'; % All possible permutations
82 cfg.method = 'montecarlo';
83 cfg.correctm = 'cluster'; % Correct for multiple comparisons
84 cfg.computeprob = 'yes';
85 cfg.computecritval = 'yes';
86 cfg.clusterthreshold = 'nonparametric_common';
87 cfg.clusteralpha = 0.05;
88 cfg.clusterstatistic = 'maxsum';
89 cfg.clustertail = 0;
90 cfg.tail = 0;
91 cfg.alpha = 0.05;
92 NSbj = 19;
93 design(1,1:2*NSbj) = repmat(1:NSbj,[1,2]);
94 design(2,1:2*NSbj) = [ones(1,NSbj),2*ones(1,NSbj)];
95 cfg.design = design;
96 cfg.uvar = 1;
97 cfg.ivar = 2;
98 cfg.spmversion = 'spm12';

```



```

99
100 % Selection of time interval and SRT
101 Time_Interval = 'PreStim'; % Time interval selection
102 switch Time_Interval
103     case 'PreStim',    cfg.latency = [-1.5 0.0];
104     case 'Stimulus',   cfg.latency = [0.0 2.0];
105     case 'Encoding',   cfg.latency = [2.0 3.5];
106     case 'Retention',  cfg.latency = [3.5 5.0];
107 end
108 SRT = 'SRT-80';
109 switch SRT
110     case 'SRT-80'
111         QOmni_Data = GA_SRT80_QOmni;
112         DM_Data = GA_SRT80_DM;
113     case 'SRT-95'
114         QOmni_Data = GA_SRT95_QOmni;
115         DM_Data = GA_SRT95_DM;
116 end
117
118 % Cluster permutation analysis
119 stat = ft_freqstatistics(cfg,QOmni_Data,DM_Data);
120
121 %% Visualization of selected clusters
122 cfg = [];
123 cfg.alpha = 0.05;
124 cfg.parameter = 'stat';
125 cfg.zlim = [-4 4];
126 cfg.layout = 'EEG1010.lay';
127 cfg.subplotsize = [1 1];
128 ft_clusterplot(cfg,stat); colormap(jet)

```

## 7 Assigned colours to each participant in Figures 3, 4 and 5

- Participant 1
- Participant 2
- Participant 3
- Participant 4
- Participant 5
- Participant 6
- Participant 7
- Participant 8
- Participant 9
- Participant 10
- Participant 11
- Participant 12
- Participant 13
- Participant 14
- Participant 15
- Participant 16
- Participant 17
- Participant 18
- Participant 19
- Participant 20

## 8 Individual spectrograms

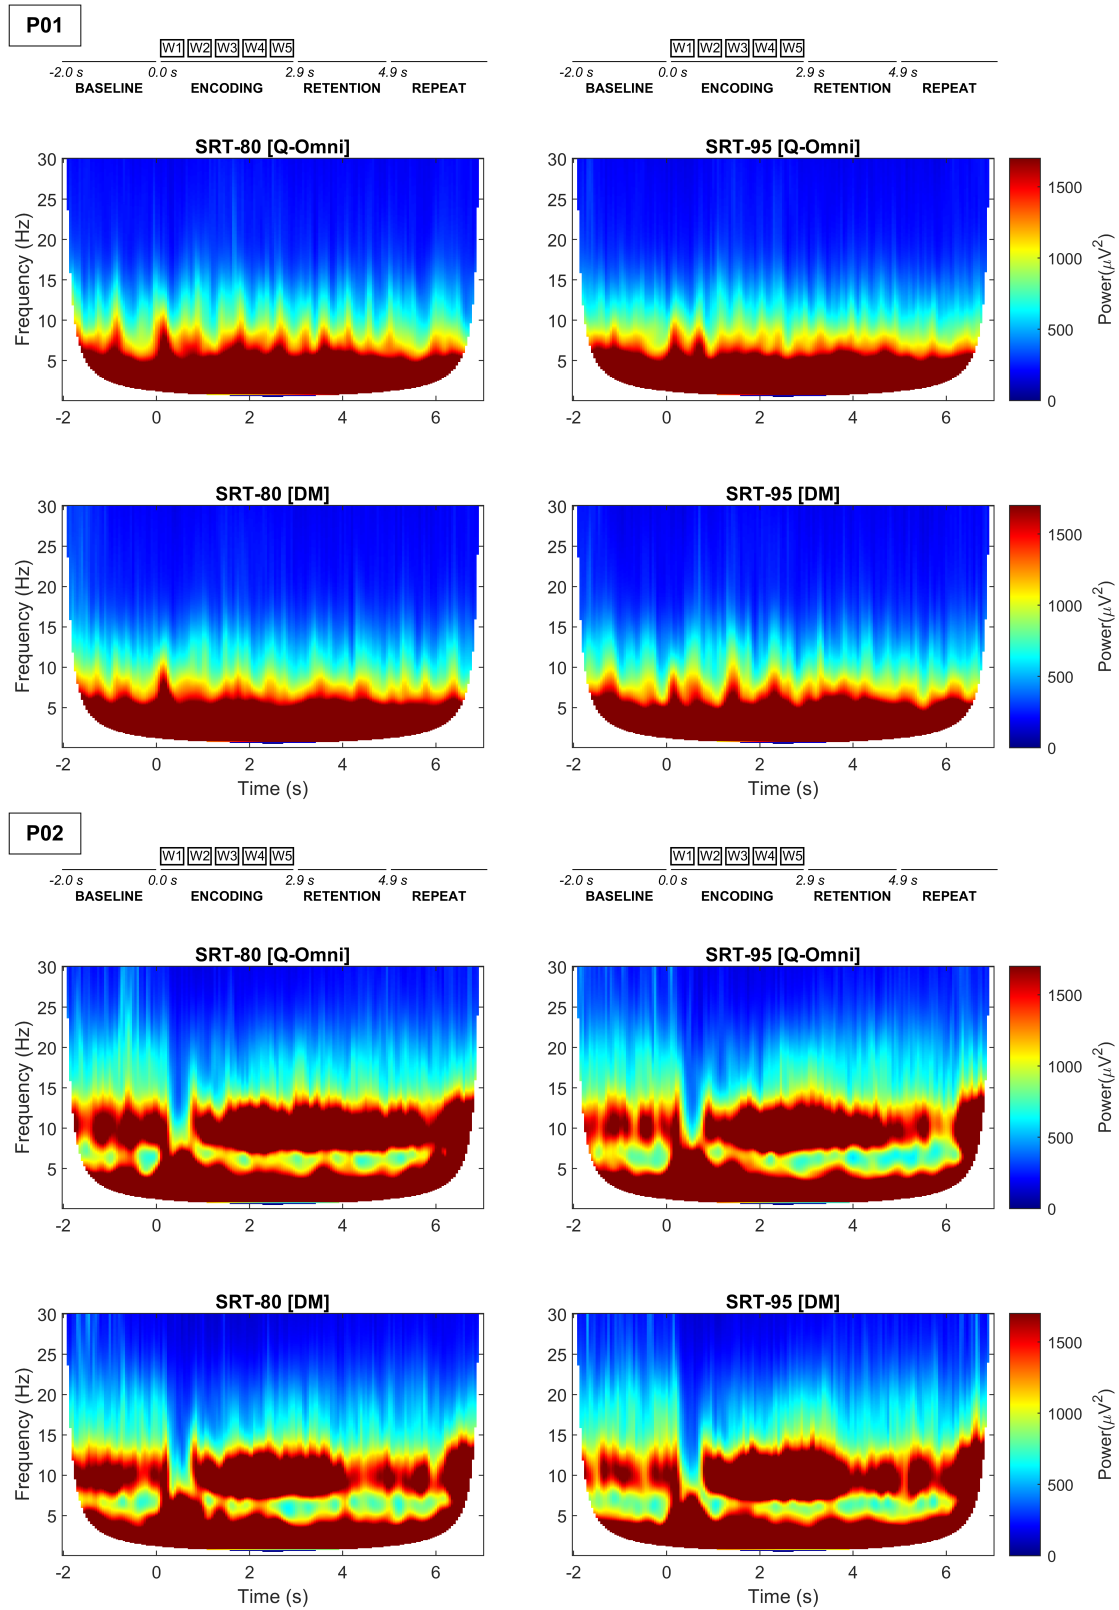

Figure 8: Individual spectrograms from the #P01 and #P02 participants.

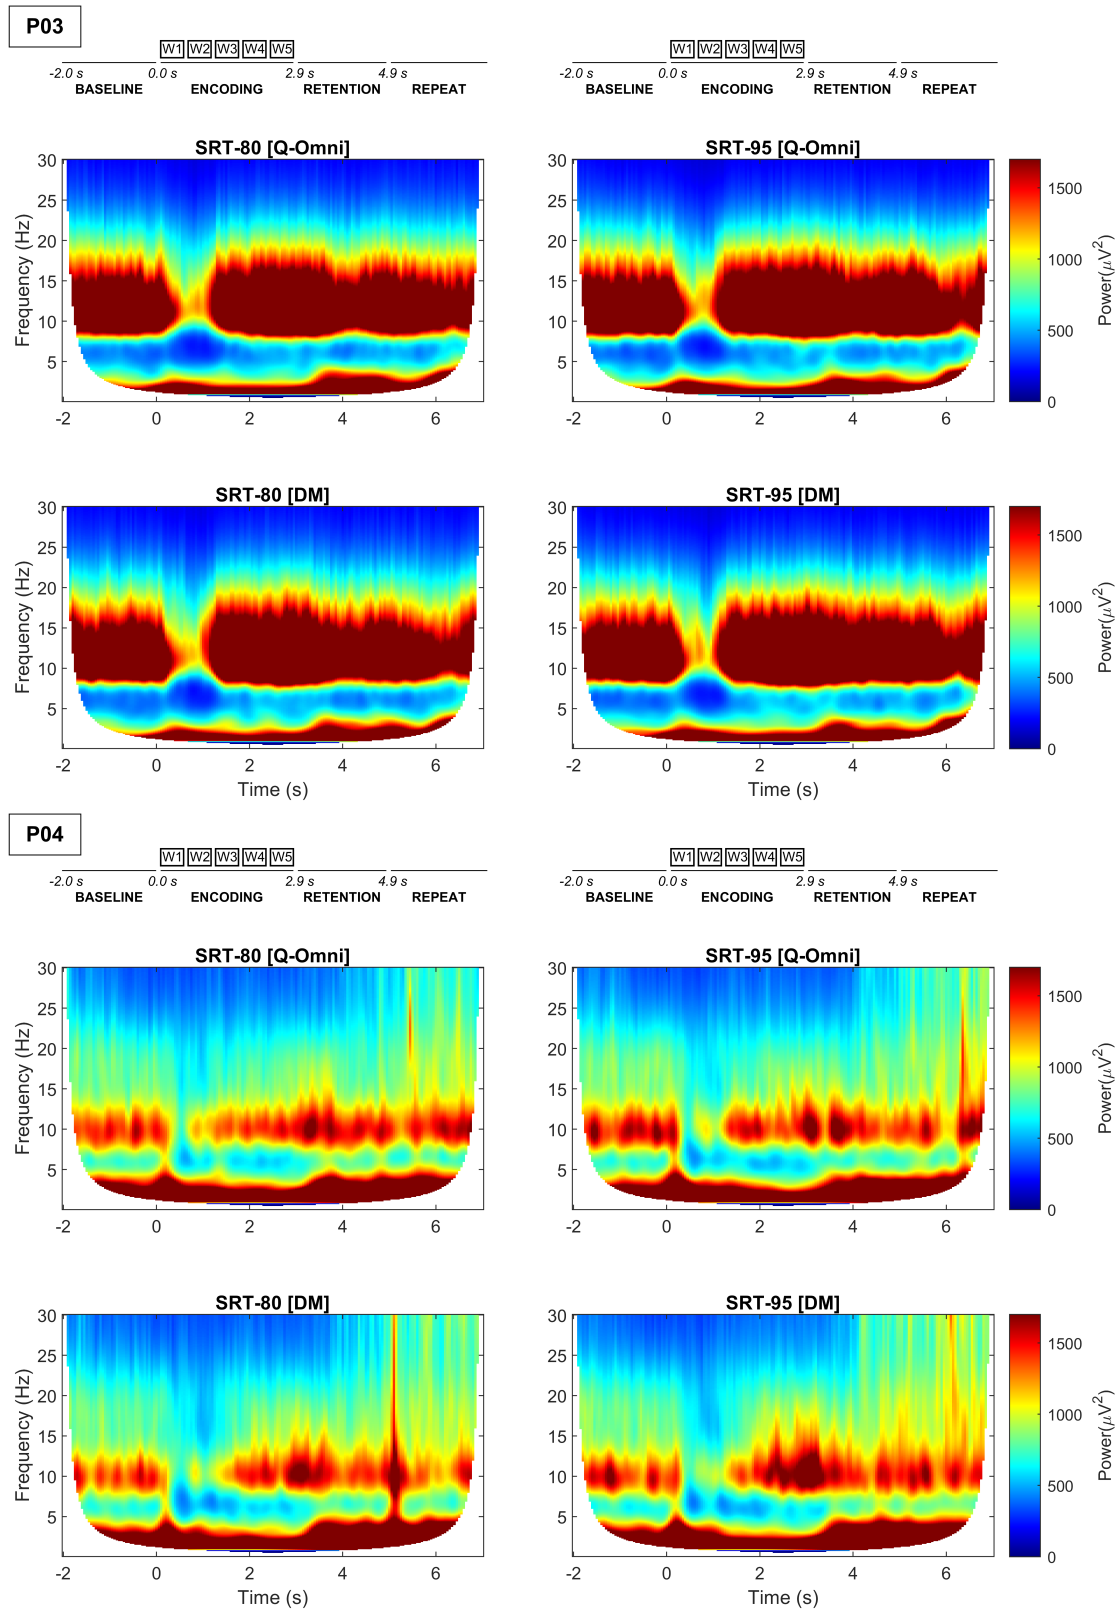

Figure 9: Individual spectrograms from the #P03 and #P04 participants.

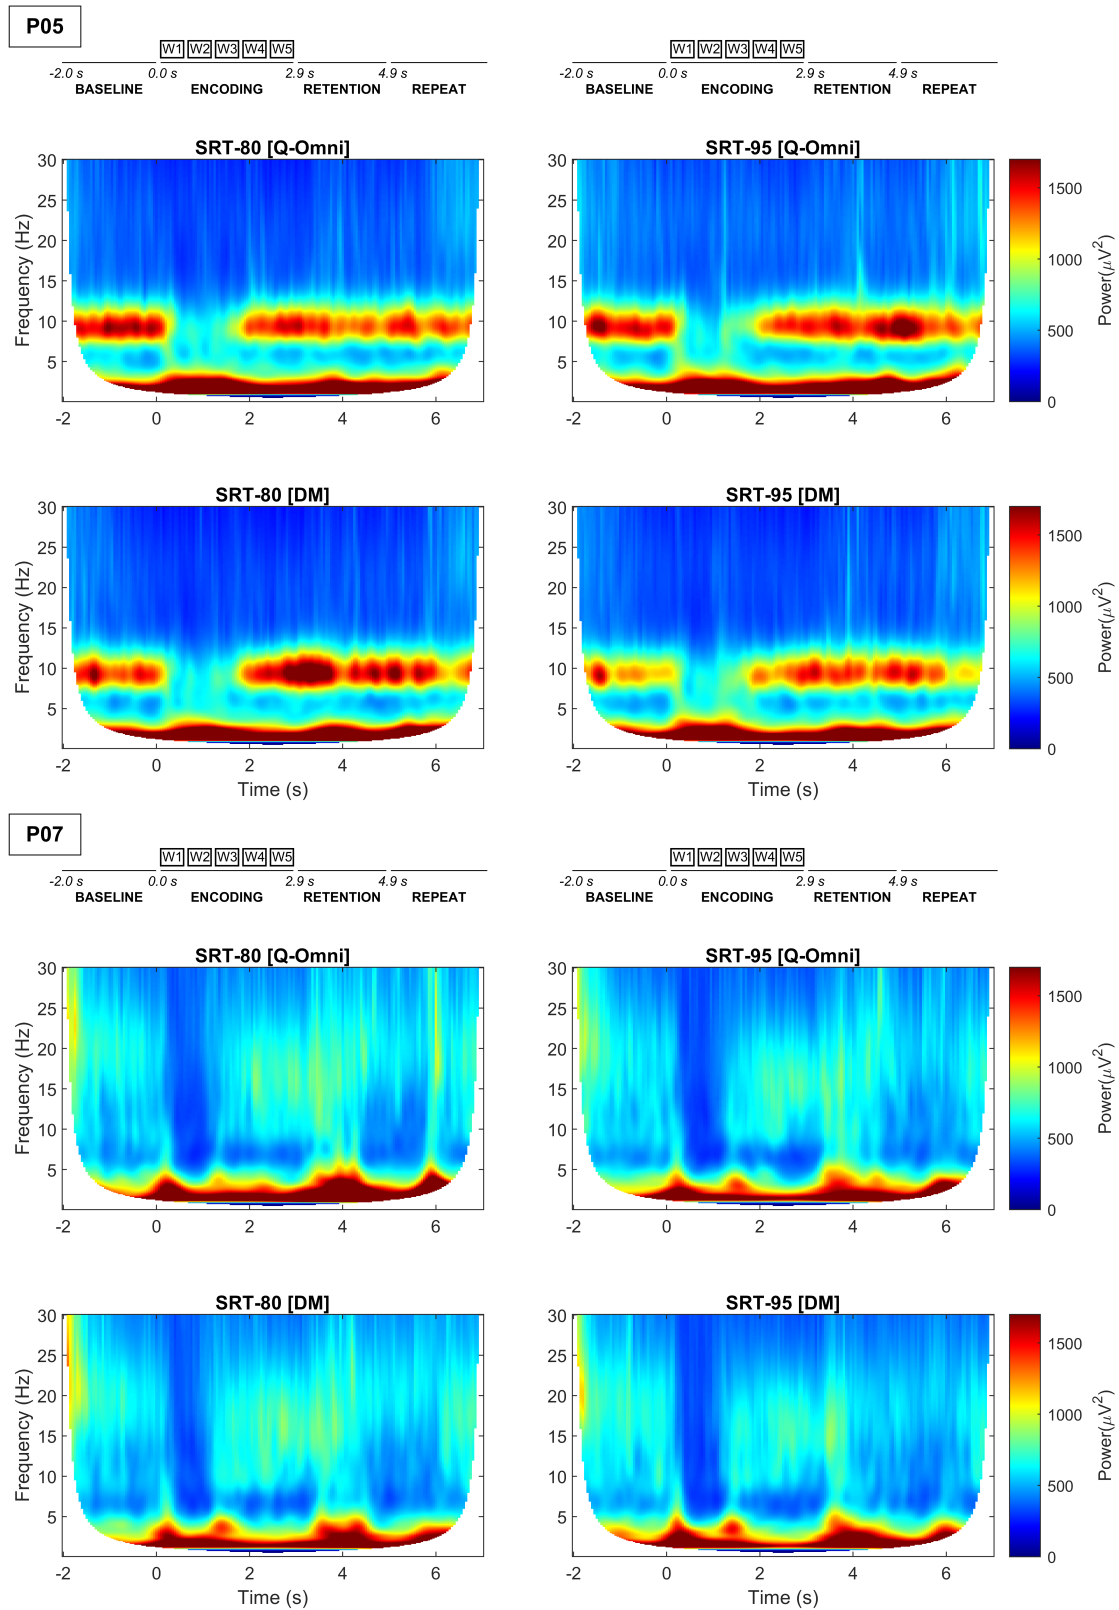

Figure 10: Individual spectrograms from the #P05 and #P07 participants.

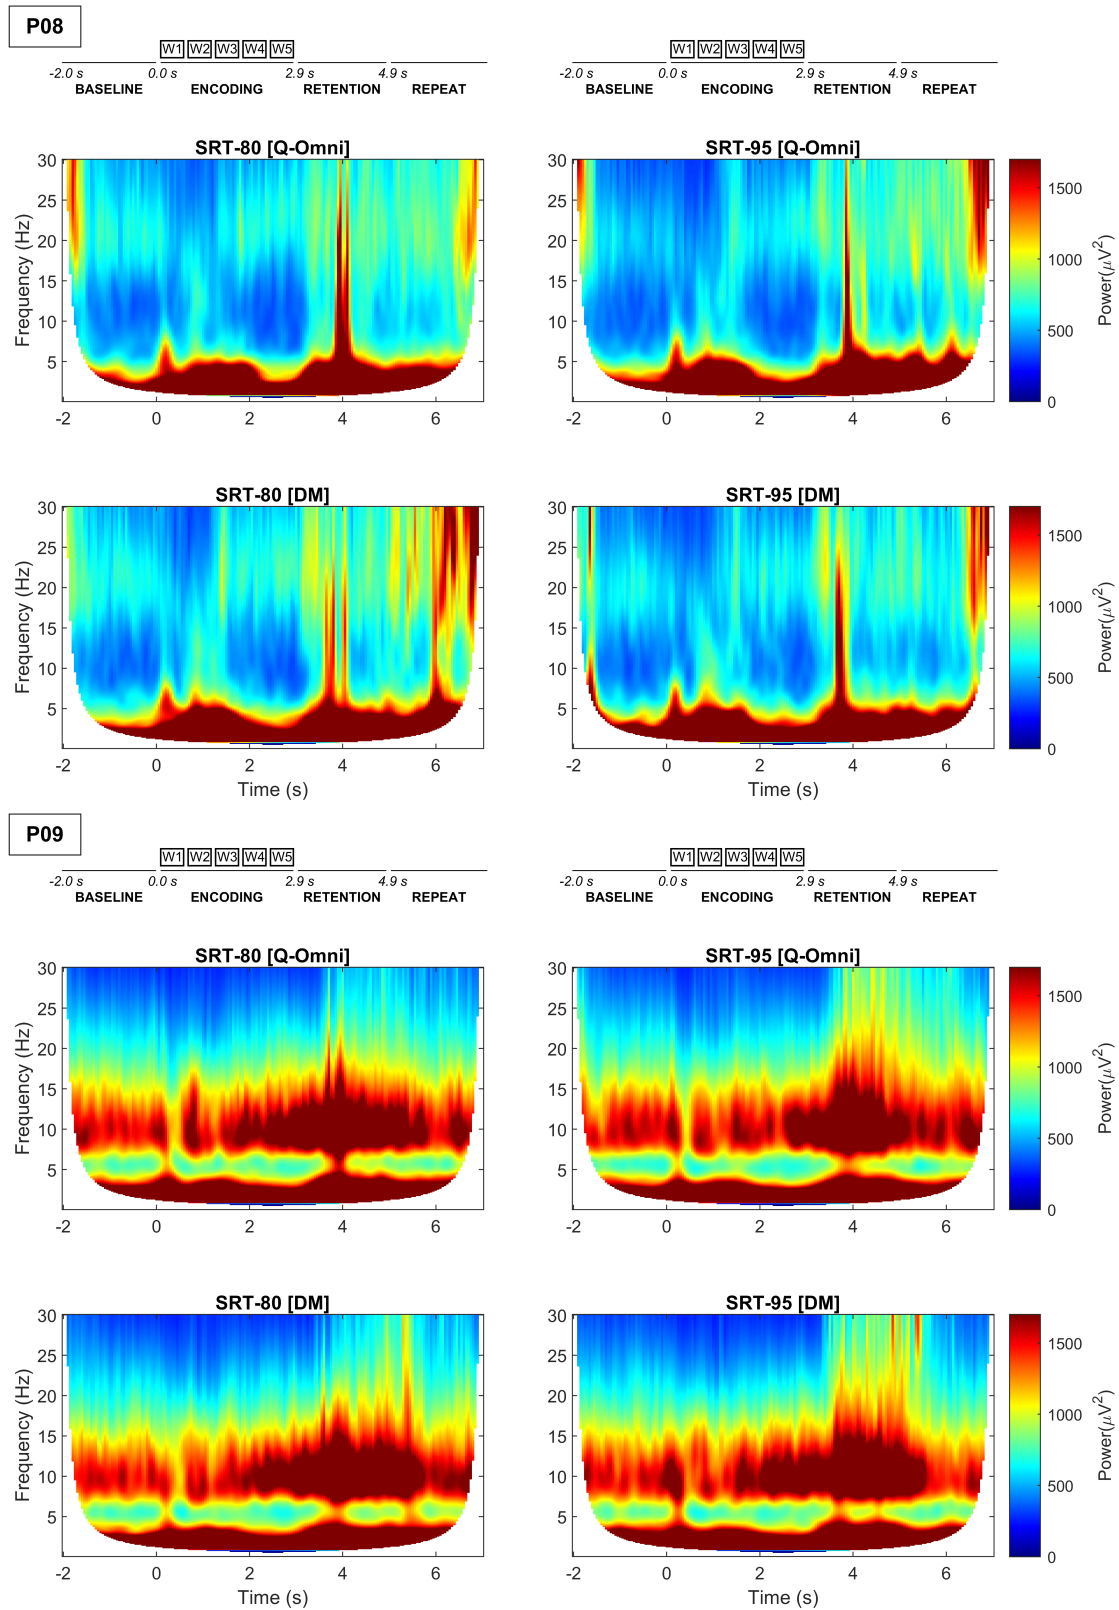

Figure 11: Individual spectrograms from the #P08 and #P09 participants.

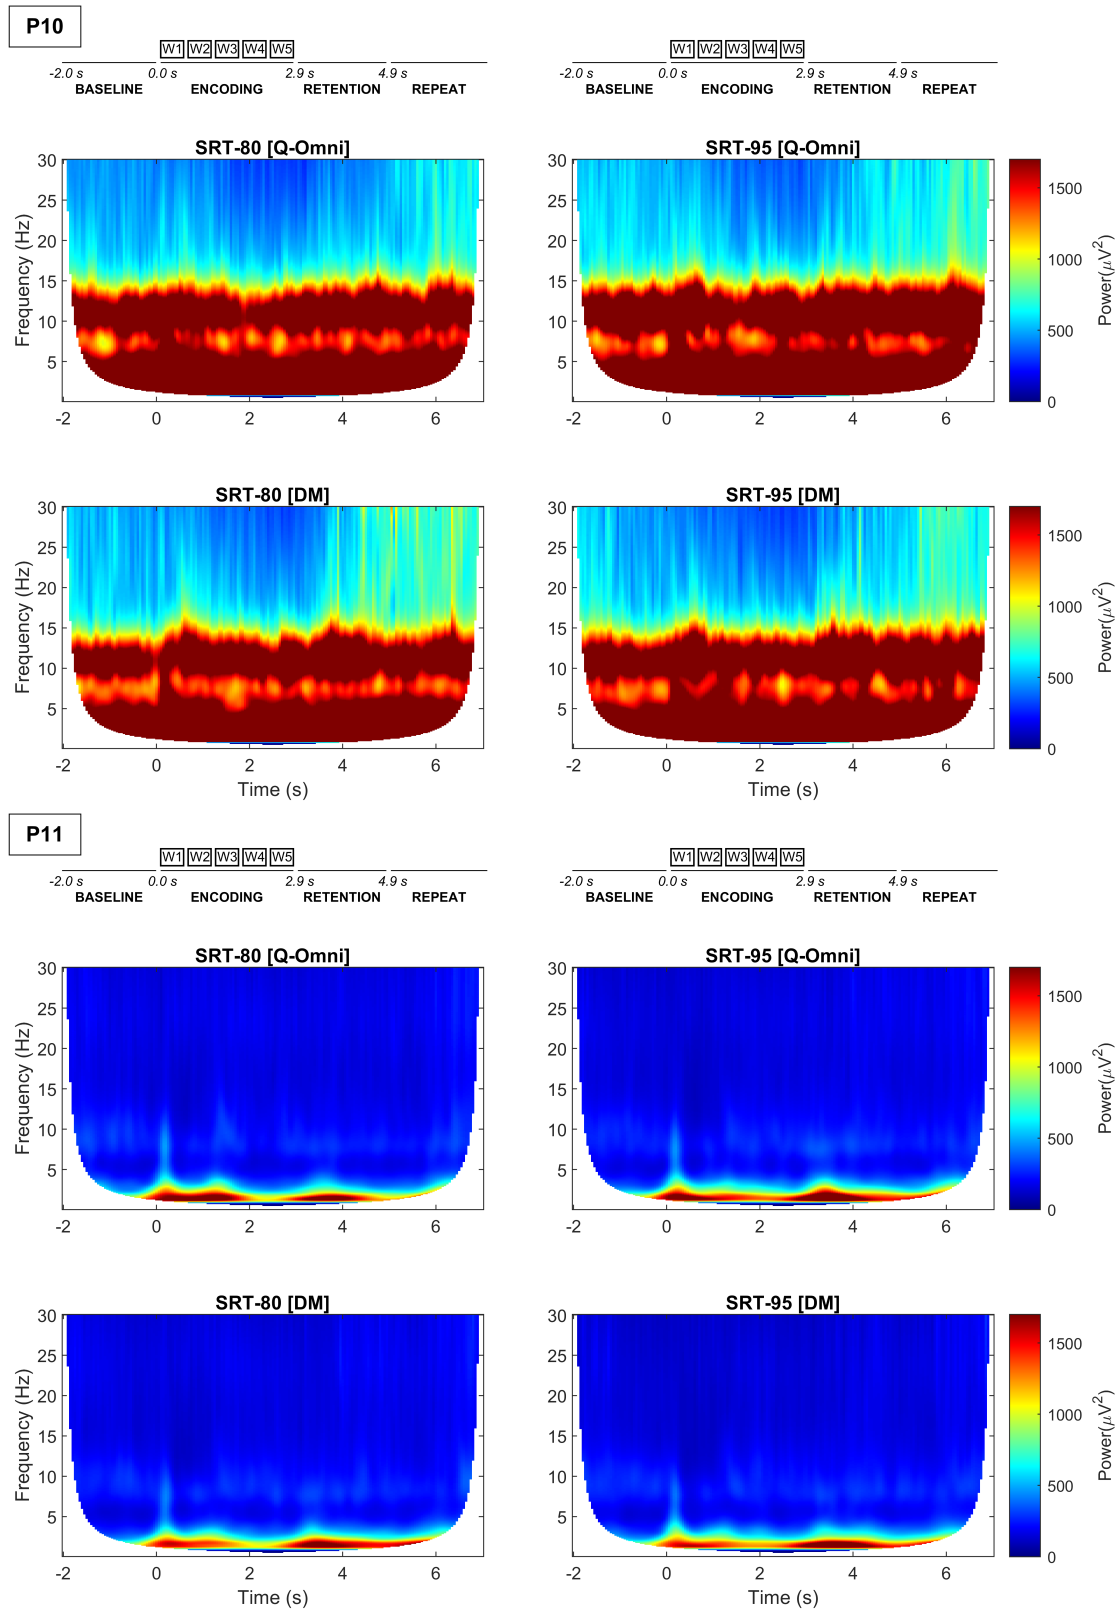

Figure 12: Individual spectrograms from the #P10 and #P11 participants.



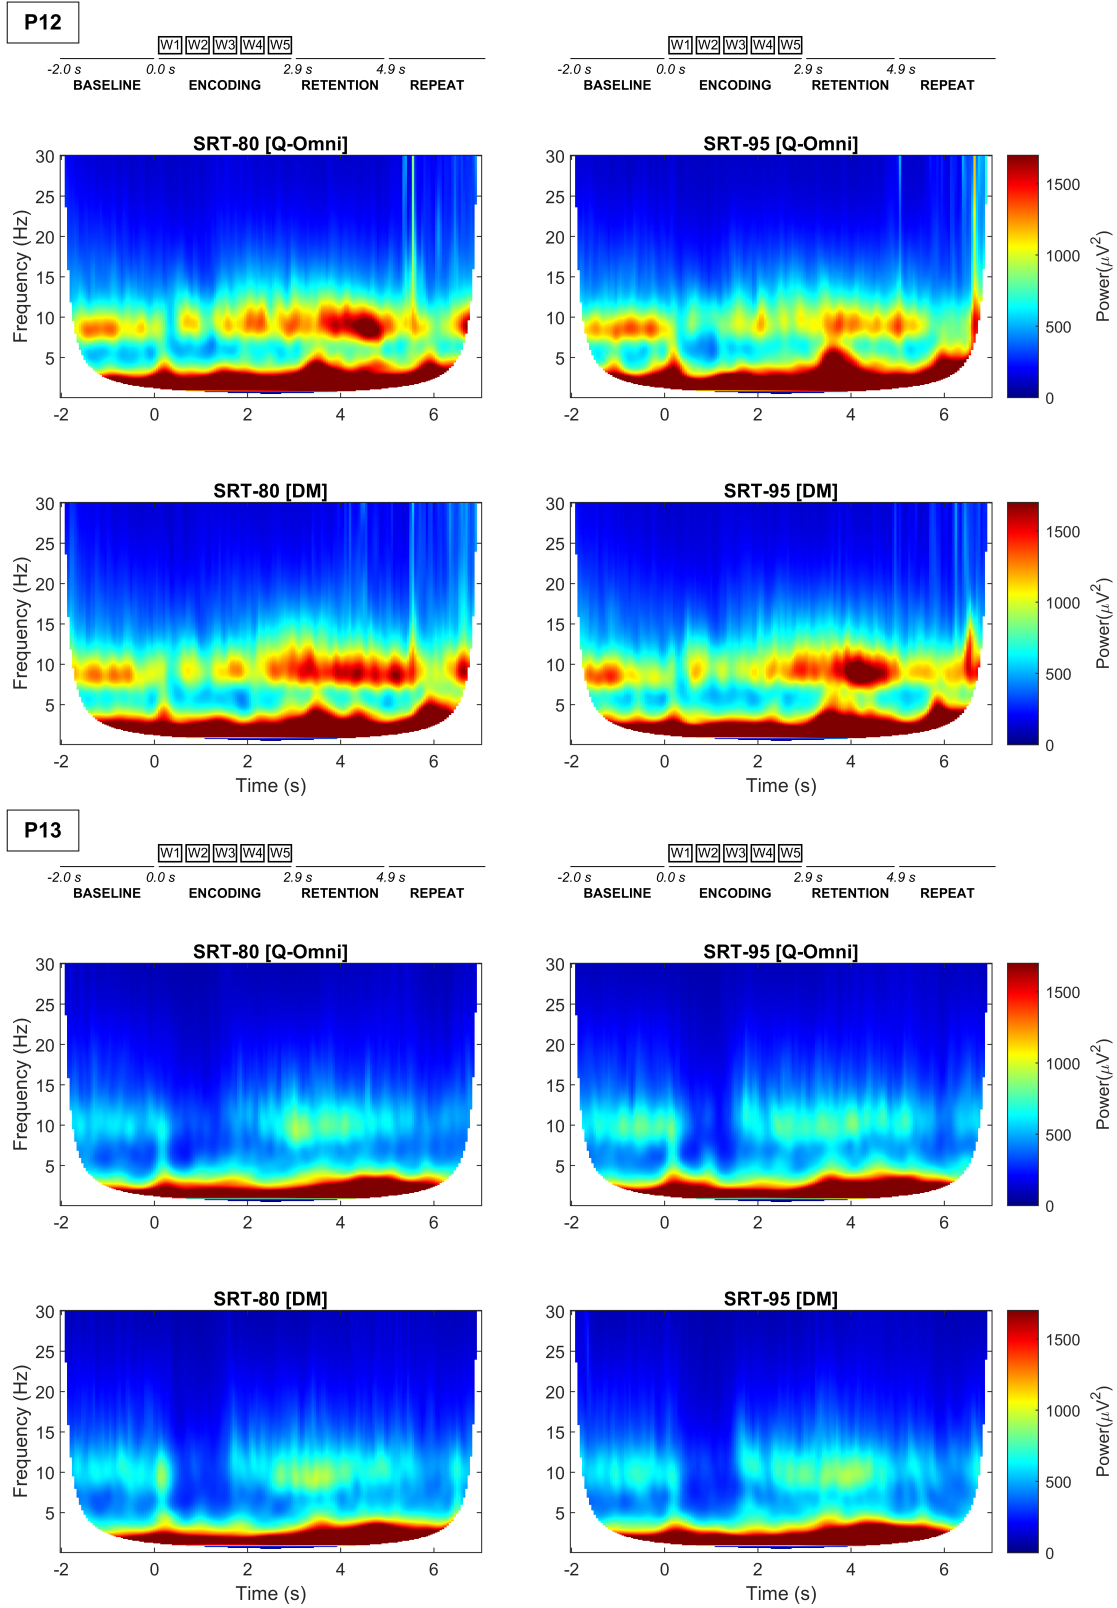

Figure 13: Individual spectrograms from the #P12 and #P13 participants.



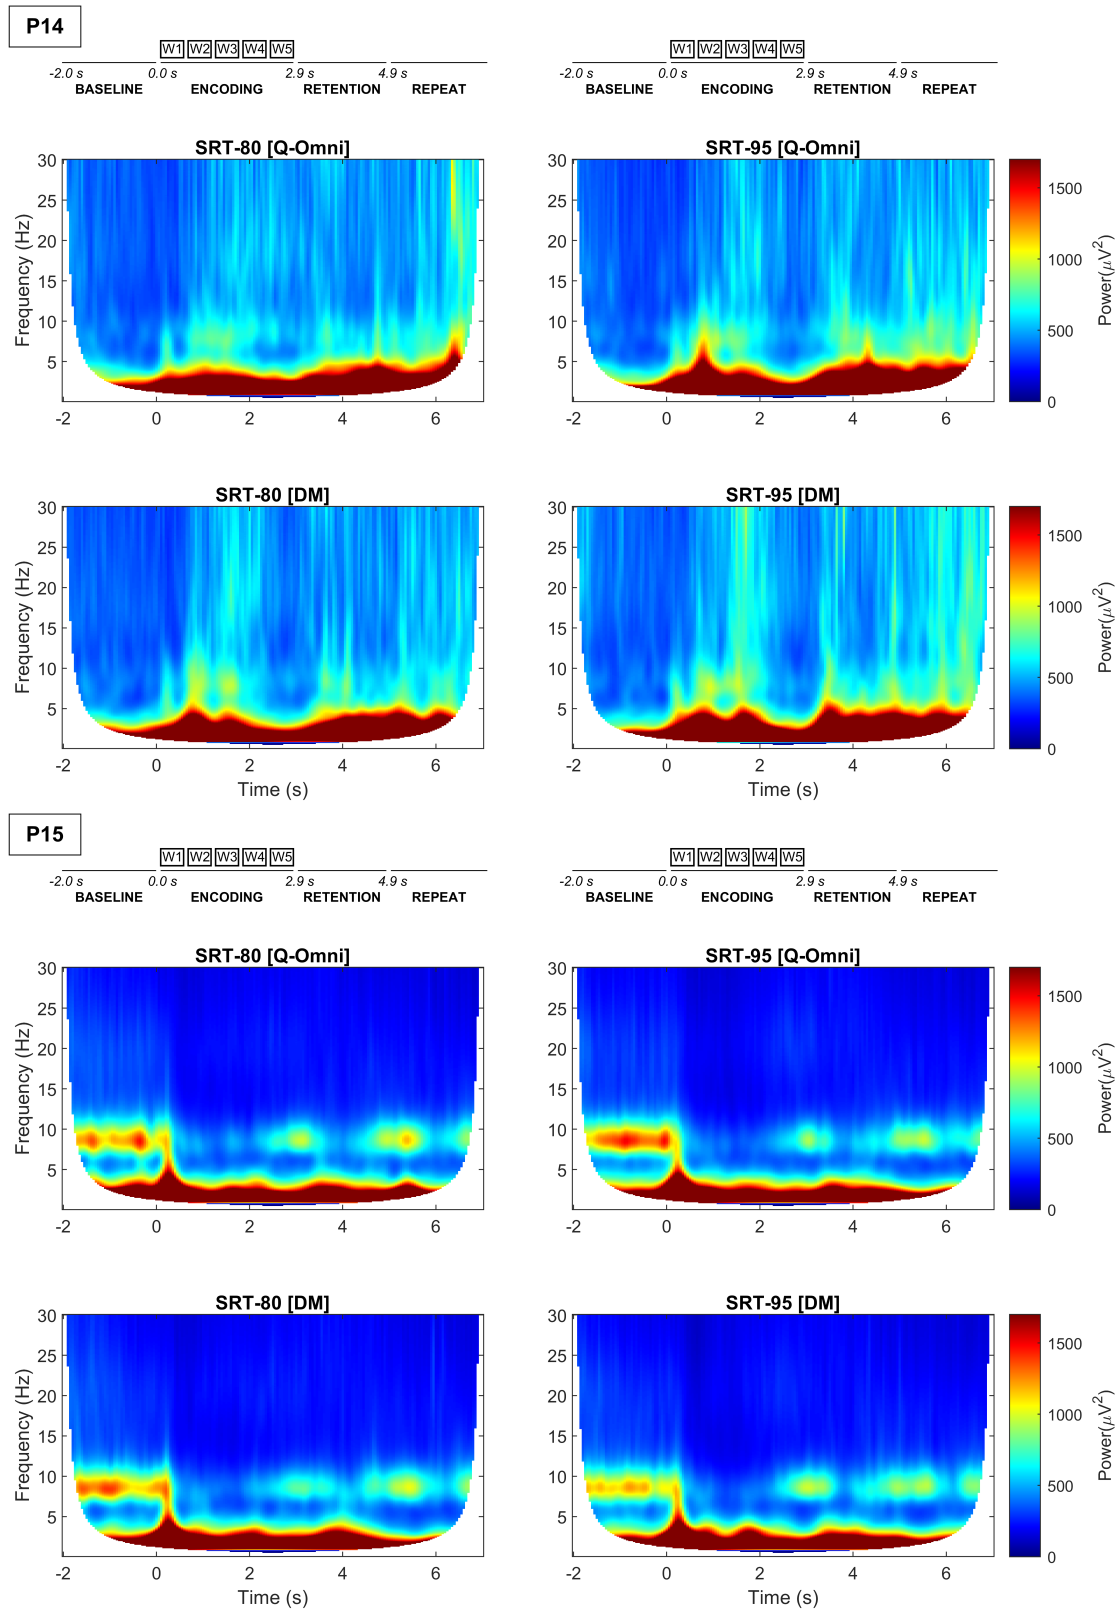

Figure 14: Individual spectrograms from the #P14 and #P15 participants.

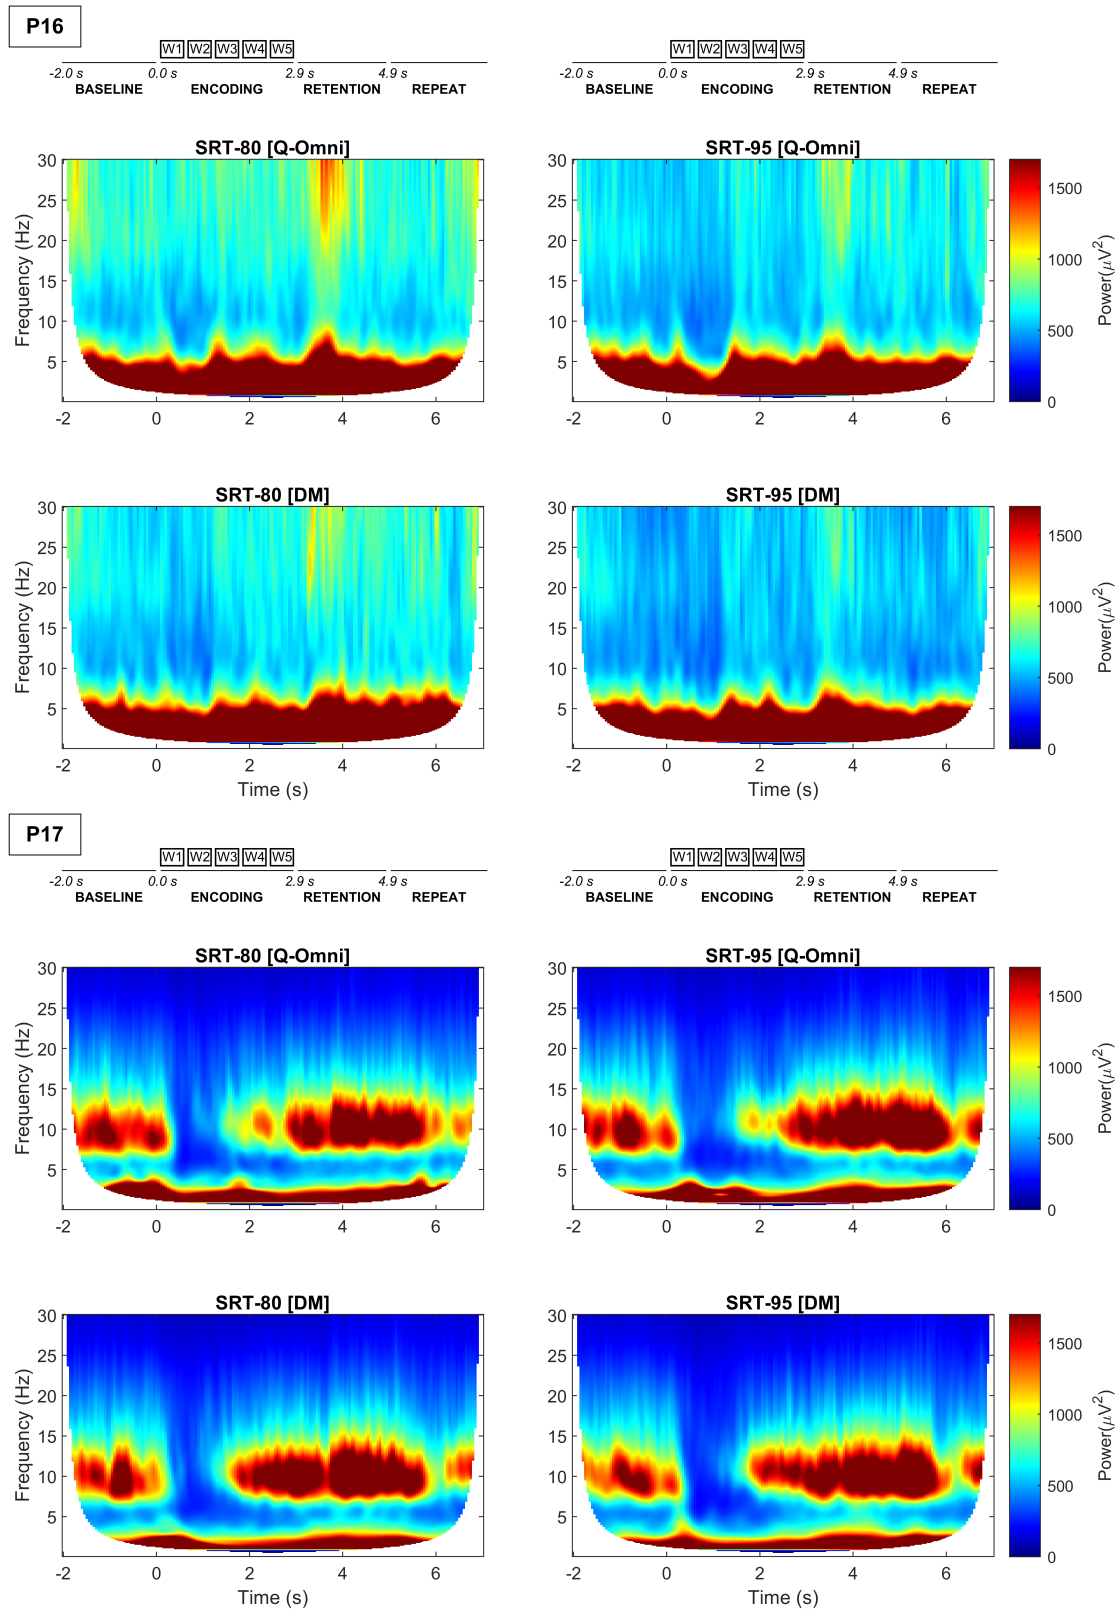

Figure 15: Individual spectrograms from the #P16 and #P17 participants.

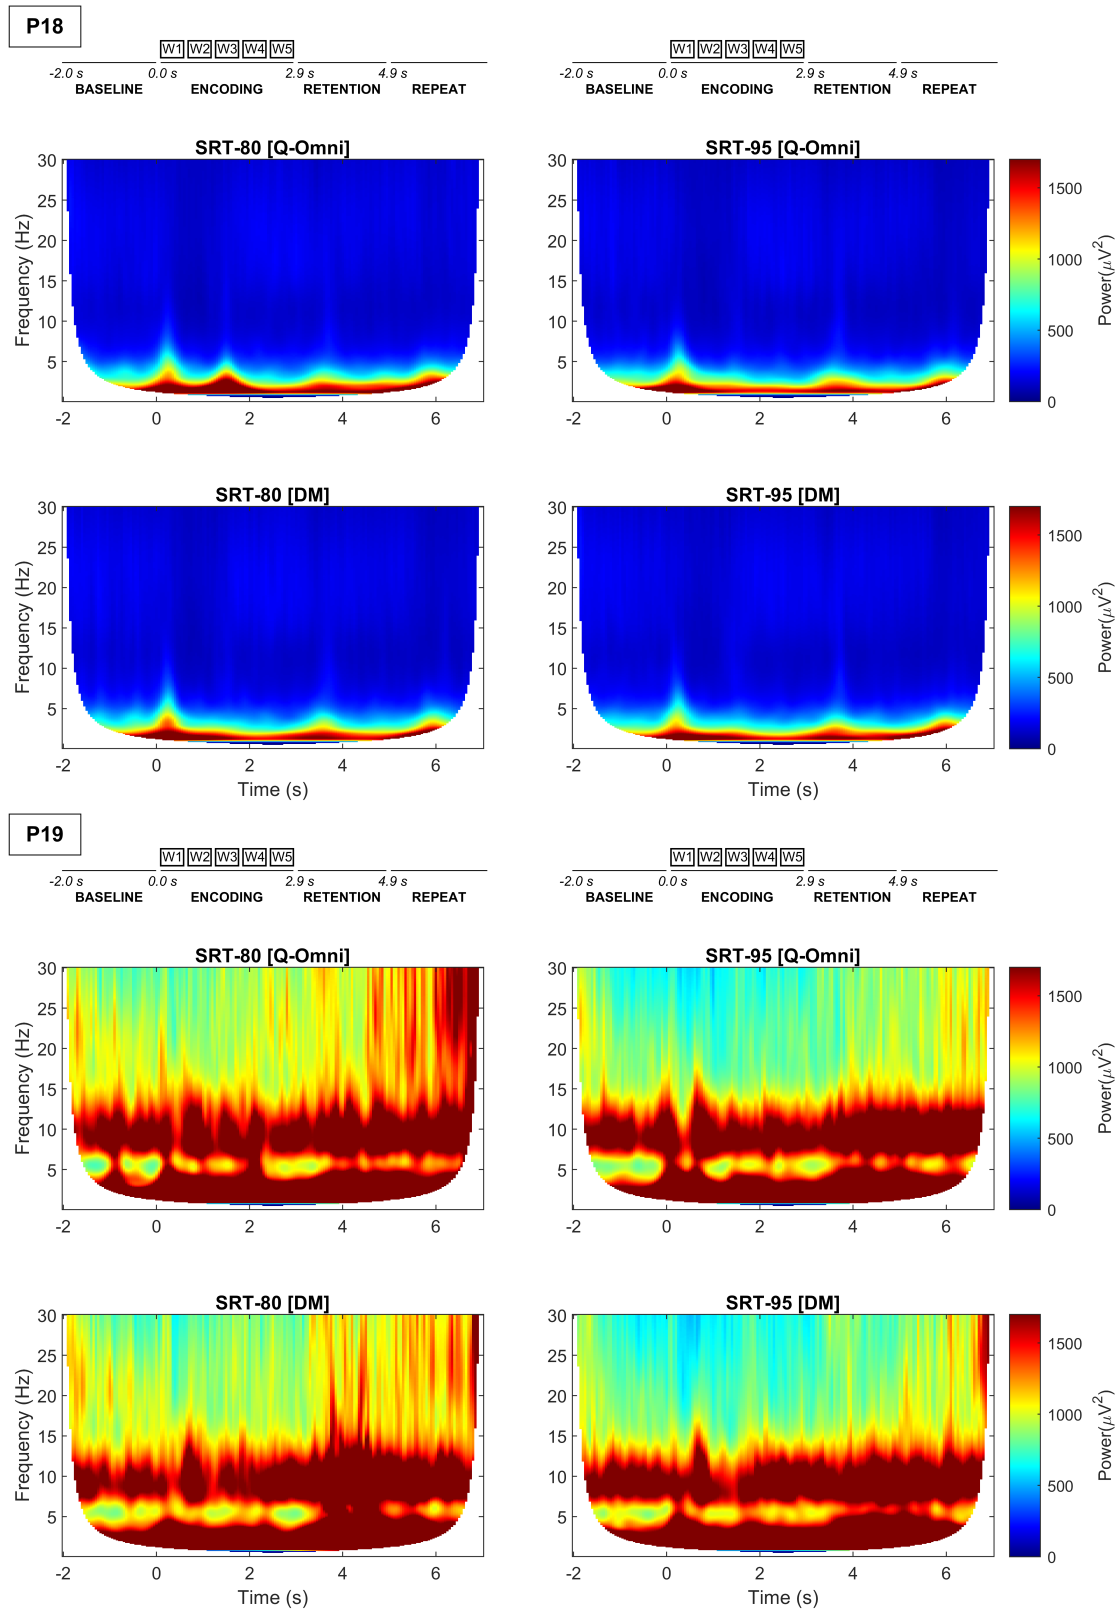

Figure 16: Individual spectrograms from the #P18 and #P19 participants.

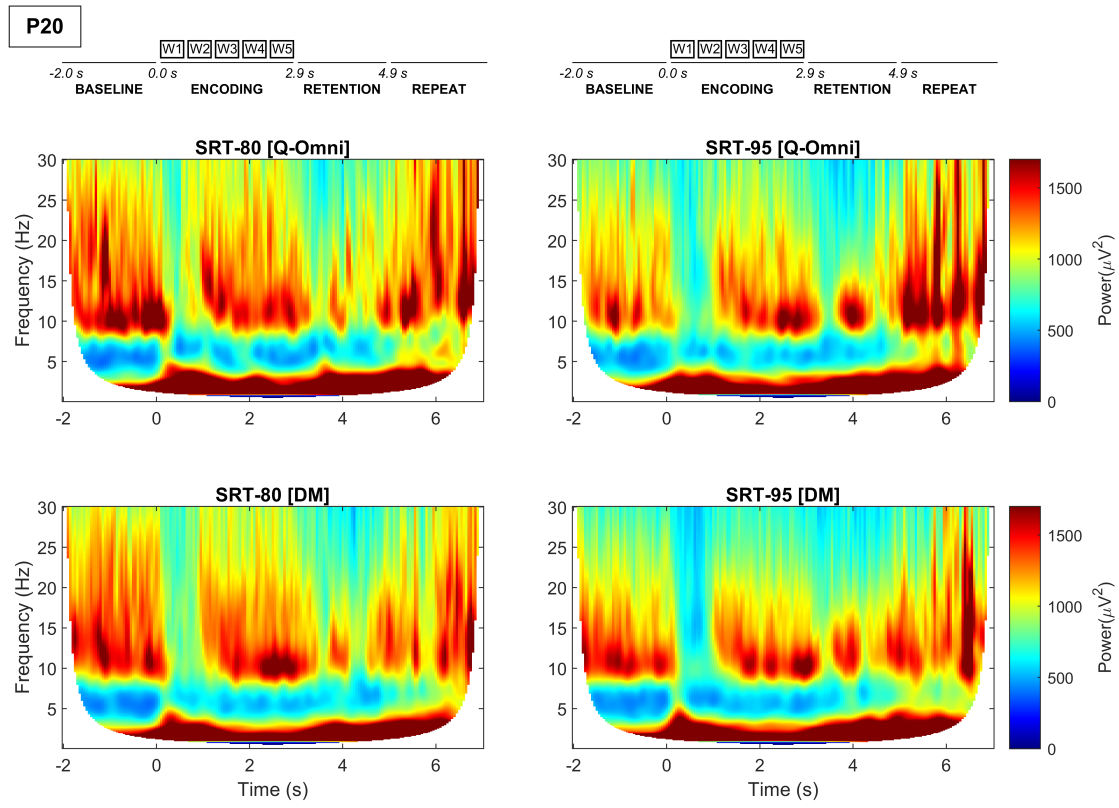

Figure 17: Individual spectrograms from the #P20 participant.

## References

- L. L. Beranek. *Acoustics McGraw-Hill – Electrical and Electronic Engineering series*. McGraw-Hill, New York, NY, 1954.
- B. Hagerman and A. Olofsson. A method to measure the effect of noise reduction algorithms using simultaneous speech and noise. *Acta Acustica united with Acustica*, 90:356–361, 2004. doi: <https://www.ingentaconnect.com/content/dav/aaau/2004/00000090/00000002/art00016#>.
- J. M. Kates. *Digital hearing aids*. Plural Publishing Inc., San Diego, CA, 2008.
- G. Keidser, H. Dillon, L. Carter, and A. O’Brien. NAL-NL2 empirical adjustments. *Trends in Amplification*, 16:211–223, 2012. doi: <https://doi.org/10.1177/1084713812468511>.
- H. Kelly, G. Lin, N. Sankaran, J. Xia, S. Kalluri, and S. Carlile. Development and evaluation of a mixed gender, multi-talker matrix sentence test in Australian English. *International Journal of Audiology*, 56:85–91, 2017. doi: <https://doi.org/10.1080/14992027.2016.1236415>.
- M. Killion, R. Schulien, L. Christensen, D. Fabry, L. Revit, P. Niquette, and K. Chung. Real-world performance of an ITE directional microphone. *The Hearing Journal*, 51:24–38, 1998. doi: <https://www.etymotic.com/wp-content/uploads/2021/05/erl-0038-1998.pdf>.
- Z. S. Nasreddine, N. A. Phillips, V. Bédirian, S. Charbonneau, V. Whitehead, I. Collin, J. L. Cummings, and H. Chertkow. The Montreal Cognitive Assessment, MoCA: a brief screening tool for mild cognitive impairment. *Journal of the American Geriatrics Society*, 53:695–699, 2005. doi: <https://doi.org/10.1111/j.1532-5415.2005.53221.x>.
- A. Weisser, J. M. Buchholz, C. Oreinos, J. Badajoz-Davila, J. Galloway, T. Beechey, and G. Keidser. The Ambisonic Recordings of Typical Environments (ARTE) Database. *Acta Acustica united with Acustica*, 105:695–713, 2019. doi: <https://doi.org/10.3813/AAA.919349>.
