# Supplementary material for: Reduced Listening Effort with Adaptive Binaural Beamforming in Realistic Noisy Environments
Source: Preprints.org preprint supplement (doi:10.20944/preprints202410.2287.v1), 2024-10-29
Supplement: Supplementary file 3 [file Metadata.xlsx]

## Sheet: Metadata
StudyID	Age	Gender (1.M)	LA 250	LA 500	LA 1000	LA 2000	LA 3000	LA 4000	LA 6000	LA 8000	RA 250	RA 500	RA 1000	RA 2000	RA 3000	RA 4000	RA 6000	RA 8000	L 4FA	R 4FA	Mean4FHL	HA use	MoCA_Scr	MoCA
P01	26.0575	1	35	35	50	60	60	60	55	40	35	35	50	60	60	60	50	40	53	53	53	22	26	0.866667
P02	74.1945	1	40	45	45	50	55	60	60	55	45	45	45	45	60	50	35	35	51	49	50	6	26	0.866667
P03	75.6849	1	20	40	55	50	50	65	60	60	20	35	50	60	65	65	70	65	52	55	53.5	7	29	0.966667
P04	79.4055	1	65	50	65	80	75	95	100	95	70	45	65	75	65	85	85	70	73	67	70	30	28	0.933333
P05	33.9836	1	30	35	50	65	60	60	55	50	30	35	50	65	65	65	60	50	54	56	55	8	27	0.9
P06	66.5014	1	45	50	60	70	70	70	70	65	40	50	60	65	65	65	65	65	64	61	62.5	20	29	0.966667
P07	79.8575	2	25	40	40	45	45	50	60	60	35	40	45	55	45	60	60	65	44	49	46.5	10	28	0.933333
P08	71.737	2	50	60	65	55	55	65	70	70	45	50	65	55	50	60	65	60	60	56	58	20	29	0.966667
P09	75.6685	1	25	35	35	35	45	50	65	70	25	35	30	40	35	50	60	75	40	38	39	10	28	0.933333
P10	19.6055	2	50	50	55	65	65	70	70	75	50	50	60	60	70	75	75	75	61	63	62	18	27	0.9
P11	81.3479	1	45	45	50	50	50	50	50	65	45	45	55	60	60	60	60	75	49	56	52.5	12	28	0.933333
P12	74.2	1	40	40	45	65	65	70	80	90	40	40	45	60	65	70	85	85	57	56	56.5	7	30	1
P13	77.4219	2	45	50	45	50	60	55	80	60	35	45	45	55	55	55	75	60	52	51	51.5	7	30	1
P14	77.7315	2	20	35	45	45	50	55	60	55	15	30	40	35	45	45	60	50	46	39	42.5	3	28	0.933333
P15	80.1507	1	35	50	55	45	50	60	60	75	40	50	45	35	50	65	70	75	52	49	50.5	6	26	0.866667
P16	80.5068	2	15	35	50	60	55	60	70	65	10	30	45	55	55	65	65	60	52	50	51	3	29	0.966667
P17	81.2575	2	15	35	45	55	45	55	70	90	10	35	50	60	50	55	70	85	47	50	48.5	20	26	0.866667
P18	73.8795	1	40	40	55	70	60	60	80	80	30	35	55	60	60	60	65	65	57	54	55.5	10	26	0.866667
P19	75.5973	2	55	50	50	50	60	65	75	70	45	40	40	45	55	60	70	80	55	48	51.5	5	30	1
P20	75.1726	2	30	50	65	75	75	80	65	60	40	55	65	80	85	80	75	70	69	73	71	10	28	0.933333
