# Supplementary material for: Reduced Listening Effort with Adaptive Binaural Beamforming in Realistic Noisy Environments
Source: Preprints.org preprint supplement (doi:10.20944/preprints202410.2287.v1), 2024-10-29
Supplement: Supplementary file 4 [file Self_Reported.xlsx]

## Sheet: Sheet1
Participant_ID	Order	Condition 1.SRT80-QOmni 2.SRT80-DM 3.SRT95-QOmni 4.SRT95-DM	Self-reported effort 1. No effort … 6. Much effort 7. Extreme effort
1	1	2	5
1	1	2	6
1	1	2	6
1	1	2	6
1	1	1	6
1	1	1	6
1	1	1	6
1	1	1	6
1	1	4	7
1	1	4	7
1	1	4	6
1	1	4	7
1	1	3	6
1	1	3	6
1	1	3	6
1	1	3	6
1	2	2	6
1	2	2	6
1	2	2	6
1	2	2	6
1	2	3	6
1	2	3	7
1	2	3	6
1	2	3	6
1	2	1
1	2	1
1	2	1
1	2	1	6
1	2	4	6
1	2	4	6
1	2	4	5
1	2	4	6
1	3	3
1	3	3
1	3	3
1	3	3
1	3	1
1	3	1
1	3	1
1	3	1
1	3	2
1	3	2
1	3	2
1	3	2
1	3	4
1	3	4
1	3	4
1	3	4
1	4	1
1	4	1
1	4	1
1	4	1
1	4	3
1	4	3
1	4	3
1	4	3
1	4	4
1	4	4
1	4	4
1	4	4
1	4	2
1	4	2
1	4	2
1	4	2
2	1	3	4
2	1	3	4
2	1	3	4
2	1	3	4
2	1	2	4
2	1	2	5
2	1	2	5
2	1	2	5
2	1	1	5
2	1	1	5
2	1	1	5
2	1	1	5
2	1	4	5
2	1	4	5
2	1	4	4
2	1	4	4
2	2	1	4
2	2	1	5
2	2	1	5
2	2	1	5
2	2	2	4
2	2	2	4
2	2	2	4
2	2	2	6
2	2	3	4
2	2	3	4
2	2	3	4
2	2	3	5
2	2	4	4
2	2	4	4
2	2	4	5
2	2	4	5
2	3	2	4
2	3	2	5
2	3	2	5
2	3	2	4
2	3	1	4
2	3	1	4
2	3	1	4
2	3	1	4
2	3	3	4
2	3	3	5
2	3	3	4
2	3	3	4
2	3	4	4
2	3	4	4
2	3	4	4
2	3	4	5
2	4	4	4
2	4	4	4
2	4	4	4
2	4	4	4
2	4	3	5
2	4	3	4
2	4	3	4
2	4	3	4
2	4	1	4
2	4	1	5
2	4	1	5
2	4	1	5
2	4	2	4
2	4	2	4
2	4	2	4
2	4	2	4
3	1	4	4
3	1	4	4
3	1	4	5
3	1	4	5
3	1	1	5
3	1	1	6
3	1	1	6
3	1	1	6
3	1	3	5
3	1	3	5
3	1	3	5
3	1	3	5
3	1	2	5
3	1	2	5
3	1	2	5
3	1	2	5
3	2	3	4
3	2	3	5
3	2	3	5
3	2	3	5
3	2	2	5
3	2	2	5
3	2	2	5
3	2	2	5
3	2	1	5
3	2	1	5
3	2	1	6
3	2	1	6
3	2	4	5
3	2	4	5
3	2	4	5
3	2	4	5
3	3	3	5
3	3	3	5
3	3	3	5
3	3	3	5
3	3	4	5
3	3	4	5
3	3	4	5
3	3	4	5
3	3	2	5
3	3	2	5
3	3	2	6
3	3	2	6
3	3	1	6
3	3	1	6
3	3	1	6
3	3	1	6
3	4	4	6
3	4	4	6
3	4	4	6
3	4	4	6
3	4	3	5
3	4	3	6
3	4	3	6
3	4	3	6
3	4	2	6
3	4	2	6
3	4	2	6
3	4	2	6
3	4	1	6
3	4	1	6
3	4	1	6
3	4	1	6
4	1	1	6
4	1	1	7
4	1	1	6
4	1	1	7
4	1	4	3
4	1	4	4
4	1	4	4
4	1	4	5
4	1	2	3
4	1	2	5
4	1	2	4
4	1	2	6
4	1	3	6
4	1	3	6
4	1	3	7
4	1	3	7
4	2	3	6
4	2	3	5
4	2	3	5
4	2	3	7
4	2	1	5
4	2	1	7
4	2	1	7
4	2	1	7
4	2	2	3
4	2	2	3
4	2	2	3
4	2	2	4
4	2	4	3
4	2	4	3
4	2	4	3
4	2	4	4
4	3	2	2
4	3	2
4	3	2	3
4	3	2	4
4	3	1	4
4	3	1	5
4	3	1	5
4	3	1	5
4	3	4	3
4	3	4	4
4	3	4	4
4	3	4	4
4	3	3	4
4	3	3	4
4	3	3	5
4	3	3	5
4	4	3	6
4	4	3	7
4	4	3	7
4	4	3	6
4	4	4	3
4	4	4	4
4	4	4	4
4	4	4	4
4	4	2	2
4	4	2	4
4	4	2	4
4	4	2	5
4	4	1	5
4	4	1	6
4	4	1	6
4	4	1	7
5	1	4	5
5	1	4	4
5	1	4	4
5	1	4	5
5	1	3	5
5	1	3	5
5	1	3	4
5	1	3	4
5	1	2	4
5	1	2	4
5	1	2	4
5	1	2	4
5	1	1	6
5	1	1	5
5	1	1	5
5	1	1	5
5	2	3	4
5	2	3	4
5	2	3	4
5	2	3	5
5	2	1	5
5	2	1	5
5	2	1	5
5	2	1	6
5	2	4	5
5	2	4	5
5	2	4	5
5	2	4	5
5	2	2	5
5	2	2	5
5	2	2	5
5	2	2	5
5	3	2	5
5	3	2	5
5	3	2	5
5	3	2	5
5	3	3	5
5	3	3	5
5	3	3	5
5	3	3	6
5	3	1	5
5	3	1	6
5	3	1	4
5	3	1	5
5	3	4	5
5	3	4	5
5	3	4	5
5	3	4	5
5	4	4	4
5	4	4	4
5	4	4	4
5	4	4	5
5	4	3	4
5	4	3	4
5	4	3	5
5	4	3	6
5	4	2	5
5	4	2	5
5	4	2	6
5	4	2	6
5	4	1	5
5	4	1	5
5	4	1	6
5	4	1	6
6	1	2	4
6	1	2	3
6	1	2	5
6	1	2	4
6	1	1	4
6	1	1	4
6	1	1	4
6	1	1	5
6	1	3	4
6	1	3	4
6	1	3	2
6	1	3	2
6	1	4	2
6	1	4	2
6	1	4	2
6	1	4	2
6	2	1	4
6	2	1	4
6	2	1	4
6	2	1	4
6	2	4	2
6	2	4	2
6	2	4	2
6	2	4	2
6	2	3	2
6	2	3	4
6	2	3	3
6	2	3	3
6	2	2	2
6	2	2	3
6	2	2	4
6	2	2	4
6	3	1	3
6	3	1	4
6	3	1	4
6	3	1	3
6	3	2	3
6	3	2	3
6	3	2	3
6	3	2	4
6	3	4	2
6	3	4	2
6	3	4	3
6	3	4	2
6	3	3	2
6	3	3	2
6	3	3	2
6	3	3	2
6	4	3	2
6	4	3	2
6	4	3	2
6	4	3	2
6	4	4	2
6	4	4	2
6	4	4	2
6	4	4	2
6	4	2	2
6	4	2	3
6	4	2	3
6	4	2	3
6	4	1	4
6	4	1	4
6	4	1	4
6	4	1	4
7	1	1	6
7	1	1	6
7	1	1
7	1	1	6
7	1	4	6
7	1	4	6
7	1	4	6
7	1	4	6
7	1	3	6
7	1	3	6
7	1	3	6
7	1	3	6
7	1	2	5
7	1	2	6
7	1	2	6
7	1	2	6
7	2	1	6
7	2	1	6
7	2	1	6
7	2	1	6
7	2	3	6
7	2	3	6
7	2	3	6
7	2	3	6
7	2	4	6
7	2	4	6
7	2	4	6
7	2	4	6
7	2	2	6
7	2	2	6
7	2	2	6
7	2	2	6
7	3	1	6
7	3	1	6
7	3	1	6
7	3	1	6
7	3	4	6
7	3	4	6
7	3	4	6
7	3	4	6
7	3	3	6
7	3	3	6
7	3	3	6
7	3	3	6
7	3	2	6
7	3	2	6
7	3	2	6
7	3	2	6
7	4	1	6
7	4	1	6
7	4	1	6
7	4	1
7	4	3	6
7	4	3	6
7	4	3	6
7	4	3	6
7	4	2	6
7	4	2	5
7	4	2	6
7	4	2	6
7	4	4	6
7	4	4	6
7	4	4	6
7	4	4	6
8	1	1	2
8	1	1	4
8	1	1	5
8	1	1	6
8	1	4	2
8	1	4	3
8	1	4	3
8	1	4	2
8	1	3	2
8	1	3	3
8	1	3	3
8	1	3	4
8	1	2	3
8	1	2	4
8	1	2	4
8	1	2	4
8	2	3	4
8	2	3	4
8	2	3	4
8	2	3	4
8	2	2	4
8	2	2	4
8	2	2	5
8	2	2	5
8	2	4	4
8	2	4	4
8	2	4	4
8	2	4	4
8	2	1	5
8	2	1	5
8	2	1	5
8	2	1	5
8	3	1	4
8	3	1	4
8	3	1	4
8	3	1	5
8	3	2	4
8	3	2	5
8	3	2	5
8	3	2	4
8	3	3	4
8	3	3	4
8	3	3	4
8	3	3	4
8	3	4	4
8	3	4	4
8	3	4	4
8	3	4	4
8	4	3	3
8	4	3	3
8	4	3	4
8	4	3	4
8	4	1	5
8	4	1	5
8	4	1	5
8	4	1	5
8	4	2	4
8	4	2	5
8	4	2	4
8	4	2	4
8	4	4	4
8	4	4	4
8	4	4	4
8	4	4	4
9	1	4	3
9	1	4	4
9	1	4	4
9	1	4	4
9	1	3	4
9	1	3	4
9	1	3	4
9	1	3	5
9	1	1	5
9	1	1
9	1	1	5
9	1	1	5
9	1	2	5
9	1	2	5
9	1	2	5
9	1	2	5
9	2	1	6
9	2	1	6
9	2	1	6
9	2	1	6
9	2	2	6
9	2	2	6
9	2	2	6
9	2	2	6
9	2	3	6
9	2	3	5
9	2	3	4
9	2	3	4
9	2	4	4
9	2	4	4
9	2	4	4
9	2	4	4
9	3	2	5
9	3	2	5
9	3	2	5
9	3	2	5
9	3	4	5
9	3	4	5
9	3	4	5
9	3	4	5
9	3	1	5
9	3	1	6
9	3	1	5
9	3	1	6
9	3	3
9	3	3	5
9	3	3	5
9	3	3	5
9	4	2	4
9	4	2	5
9	4	2	5
9	4	2
9	4	1	5
9	4	1	5
9	4	1	6
9	4	1	6
9	4	4	4
9	4	4	5
9	4	4	5
9	4	4	4
9	4	3	5
9	4	3	5
9	4	3	5
9	4	3	5
10	1	3	5
10	1	3	5
10	1	3	5
10	1	3	5
10	1	1	5
10	1	1	6
10	1	1	6
10	1	1	6
10	1	2	5
10	1	2	6
10	1	2	6
10	1	2	6
10	1	4	5
10	1	4	6
10	1	4	6
10	1	4	6
10	2	2	5
10	2	2	6
10	2	2	6
10	2	2	6
10	2	4	5
10	2	4	6
10	2	4	6
10	2	4	6
10	2	3	5
10	2	3	6
10	2	3	6
10	2	3	6
10	2	1	6
10	2	1	6
10	2	1	6
10	2	1	6
10	3	4	5
10	3	4	5
10	3	4	5
10	3	4	5
10	3	2	5
10	3	2	5
10	3	2	6
10	3	2	6
10	3	1	2
10	3	1	5
10	3	1	6
10	3	1	6
10	3	3	5
10	3	3	6
10	3	3	6
10	3	3	6
10	4	1	6
10	4	1	5
10	4	1	5
10	4	1	6
10	4	4	6
10	4	4	6
10	4	4	6
10	4	4	6
10	4	2	6
10	4	2	6
10	4	2	5
10	4	2	6
10	4	3	6
10	4	3	6
10	4	3	6
10	4	3	6
11	1	4	4
11	1	4	2
11	1	4	2
11	1	4	2
11	1	3	2
11	1	3	2
11	1	3	2
11	1	3	2
11	1	2	2
11	1	2	2
11	1	2	2
11	1	2	2
11	1	1	2
11	1	1	2
11	1	1	2
11	1	1	3
11	2	2	2
11	2	2	2
11	2	2	2
11	2	2	2
11	2	4	2
11	2	4	2
11	2	4	2
11	2	4	3
11	2	1	3
11	2	1	3
11	2	1	3
11	2	1	3
11	2	3	2
11	2	3	2
11	2	3	2
11	2	3	3
11	3	1	2
11	3	1	4
11	3	1	4
11	3	1	5
11	3	3	3
11	3	3	3
11	3	3	3
11	3	3	3
11	3	2	3
11	3	2	3
11	3	2	3
11	3	2	3
11	3	4	3
11	3	4	3
11	3	4	3
11	3	4	3
11	4	2	3
11	4	2	3
11	4	2	3
11	4	2	3
11	4	4	3
11	4	4	3
11	4	4	3
11	4	4	3
11	4	3	3
11	4	3
11	4	3	3
11	4	3	3
11	4	1	3
11	4	1	3
11	4	1	3
11	4	1	3
12	1	1	2
12	1	1	4
12	1	1	5
12	1	1	5
12	1	3	5
12	1	3	3
12	1	3	4
12	1	3	4
12	1	4	4
12	1	4	3
12	1	4	3
12	1	4	3
12	1	2	3
12	1	2	4
12	1	2	3
12	1	2	4
12	2	1	3
12	2	1	5
12	2	1	4
12	2	1	5
12	2	4	3
12	2	4	5
12	2	4	2
12	2	4	4
12	2	3	4
12	2	3	3
12	2	3	3
12	2	3	3
12	2	2	3
12	2	2	4
12	2	2	5
12	2	2	5
12	3	3	3
12	3	3	4
12	3	3	4
12	3	3	3
12	3	1	3
12	3	1	5
12	3	1	5
12	3	1	5
12	3	4	1
12	3	4	1
12	3	4	1
12	3	4	2
12	3	2	2
12	3	2	2
12	3	2	3
12	3	2	3
12	4	3	2
12	4	3	3
12	4	3	3
12	4	3	4
12	4	2	1
12	4	2	5
12	4	2	4
12	4	2	4
12	4	4	1
12	4	4	3
12	4	4	2
12	4	4	2
12	4	1	3
12	4	1	3
12	4	1	3
12	4	1	3
13	1	2	6
13	1	2	6
13	1	2	6
13	1	2	7
13	1	1	7
13	1	1	7
13	1	1	7
13	1	1	7
13	1	4	6
13	1	4	7
13	1	4	6
13	1	4	5
13	1	3	5
13	1	3	5
13	1	3	5
13	1	3	5
13	2	1	5
13	2	1	6
13	2	1	6
13	2	1	6
13	2	4	5
13	2	4	5
13	2	4	5
13	2	4	5
13	2	2	5
13	2	2	6
13	2	2	5
13	2	2	5
13	2	3	5
13	2	3	5
13	2	3	5
13	2	3
13	3	3	5
13	3	3	5
13	3	3	5
13	3	3	5
13	3	1	5
13	3	1	6
13	3	1	5
13	3	1	6
13	3	4	5
13	3	4	6
13	3	4	6
13	3	4	5
13	3	2	5
13	3	2	5
13	3	2	6
13	3	2	6
13	4	4	5
13	4	4	5
13	4	4	6
13	4	4	6
13	4	2	5
13	4	2	6
13	4	2	6
13	4	2	7
13	4	3	6
13	4	3	6
13	4	3	6
13	4	3	6
13	4	1	6
13	4	1	7
13	4	1	7
13	4	1	7
14	1	1	7
14	1	1	6
14	1	1	6
14	1	1	6
14	1	4	5
14	1	4	5
14	1	4	5
14	1	4	4
14	1	3	4
14	1	3	4
14	1	3	4
14	1	3	4
14	1	2	4
14	1	2	4
14	1	2	4
14	1	2	4
14	2	4	4
14	2	4	4
14	2	4	4
14	2	4	4
14	2	1	4
14	2	1	5
14	2	1	5
14	2	1	5
14	2	2	5
14	2	2	5
14	2	2	5
14	2	2	5
14	2	3	4
14	2	3	5
14	2	3	5
14	2	3	4
14	3	4	4
14	3	4	5
14	3	4	4
14	3	4	4
14	3	1	5
14	3	1	5
14	3	1	5
14	3	1	5
14	3	3	4
14	3	3	4
14	3	3	4
14	3	3	4
14	3	2	4
14	3	2	5
14	3	2	4
14	3	2	4
14	4	3	4
14	4	3	4
14	4	3	4
14	4	3	5
14	4	4	4
14	4	4	4
14	4	4	4
14	4	4	4
14	4	1	4
14	4	1	5
14	4	1	5
14	4	1	5
14	4	2	4
14	4	2	4
14	4	2	5
14	4	2	5
15	1	4
15	1	4
15	1	4
15	1	4
15	1	3
15	1	3
15	1	3	3
15	1	3
15	1	2	2
15	1	2	3
15	1	2	3
15	1	2	3
15	1	1	3
15	1	1	3
15	1	1	3
15	1	1	3
15	2	1	3
15	2	1	3
15	2	1	3
15	2	1	3
15	2	4	3
15	2	4	3
15	2	4	3
15	2	4	3
15	2	3	3
15	2	3	3
15	2	3	3
15	2	3	3
15	2	2	3
15	2	2	3
15	2	2	3
15	2	2	3
15	3	2	3
15	3	2	3
15	3	2	3
15	3	2	3
15	3	4	3
15	3	4	3
15	3	4	3
15	3	4	3
15	3	3	3
15	3	3	3
15	3	3	3
15	3	3	3
15	3	1	3
15	3	1	3
15	3	1	3
15	3	1	3
15	4	1	3
15	4	1	3
15	4	1	3
15	4	1	3
15	4	4	3
15	4	4	3
15	4	4	3
15	4	4	3
15	4	3	3
15	4	3	3
15	4	3	3
15	4	3	3
15	4	2	3
15	4	2	3
15	4	2	3
15	4	2	3
16	1	4
16	1	4
16	1	4
16	1	4
16	1	2	2
16	1	2	5
16	1	2	5
16	1	2	5
16	1	3
16	1	3	2
16	1	3	5
16	1	3	5
16	1	1	6
16	1	1	6
16	1	1	6
16	1	1	6
16	2	3	5
16	2	3	5
16	2	3	5
16	2	3	5
16	2	2	5
16	2	2	4
16	2	2	4
16	2	2	5
16	2	4	5
16	2	4	5
16	2	4	5
16	2	4	5
16	2	1	5
16	2	1	4
16	2	1	5
16	2	1	5
16	3	3	5
16	3	3	5
16	3	3	5
16	3	3	5
16	3	1	6
16	3	1	5
16	3	1	4
16	3	1	5
16	3	4	4
16	3	4	4
16	3	4	5
16	3	4	4
16	3	2	5
16	3	2	5
16	3	2	4
16	3	2	4
16	4	3	4
16	4	3	4
16	4	3	4
16	4	3	4
16	4	2	5
16	4	2	5
16	4	2	5
16	4	2	5
16	4	4	4
16	4	4	4
16	4	4	4
16	4	4	4
16	4	1	6
16	4	1	6
16	4	1	6
16	4	1	5
17	1	3	4
17	1	3	5
17	1	3	5
17	1	3	4
17	1	4	3
17	1	4	4
17	1	4	3
17	1	4	3
17	1	1	4
17	1	1	4
17	1	1	2
17	1	1	3
17	1	2	3
17	1	2	3
17	1	2	2
17	1	2	3
17	2	4	4
17	2	4	3
17	2	4	2
17	2	4	2
17	2	2	2
17	2	2	3
17	2	2	2
17	2	2	3
17	2	1	4
17	2	1	3
17	2	1	2
17	2	1	3
17	2	3	2
17	2	3	2
17	2	3	3
17	2	3	3
17	3	3	2
17	3	3	3
17	3	3	3
17	3	3	2
17	3	4	2
17	3	4	3
17	3	4	2
17	3	4	1
17	3	1	2
17	3	1	2
17	3	1	3
17	3	1	2
17	3	2	2
17	3	2	1
17	3	2	2
17	3	2	2
17	4	1	2
17	4	1	2
17	4	1	2
17	4	1	3
17	4	4	1
17	4	4	2
17	4	4	2
17	4	4	2
17	4	2	2
17	4	2	3
17	4	2	4
17	4	2	2
17	4	3	2
17	4	3	2
17	4	3	2
17	4	3	1
18	1	1	5
18	1	1	4
18	1	1	4
18	1	1	5
18	1	2	4
18	1	2	4
18	1	2	5
18	1	2	4
18	1	4	3
18	1	4	3
18	1	4	2
18	1	4	3
18	1	3	3
18	1	3	3
18	1	3	2
18	1	3	3
18	2	1	3
18	2	1	4
18	2	1	4
18	2	1	4
18	2	3	3
18	2	3	3
18	2	3	3
18	2	3	3
18	2	4	3
18	2	4	3
18	2	4	3
18	2	4	3
18	2	2	3
18	2	2	3
18	2	2	4
18	2	2	4
18	3	3	3
18	3	3	3
18	3	3	2
18	3	3	2
18	3	4	2
18	3	4	3
18	3	4	3
18	3	4	3
18	3	2	3
18	3	2	3
18	3	2	3
18	3	2	4
18	3	1	4
18	3	1	5
18	3	1	4
18	3	1	4
18	4	3	3
18	4	3	3
18	4	3	3
18	4	3	3
18	4	4	3
18	4	4	3
18	4	4	3
18	4	4	3
18	4	2	3
18	4	2	4
18	4	2	4
18	4	2	3
18	4	1	4
18	4	1	4
18	4	1	4
18	4	1	5
19	1	2	6
19	1	2	6
19	1	2	6
19	1	2	6
19	1	4	5
19	1	4	5
19	1	4	5
19	1	4	5
19	1	1	5
19	1	1	5
19	1	1	6
19	1	1	6
19	1	3	5
19	1	3	5
19	1	3	6
19	1	3	5
19	2	3	5
19	2	3	5
19	2	3	5
19	2	3	6
19	2	4	5
19	2	4	5
19	2	4	5
19	2	4	5
19	2	1	5
19	2	1	4
19	2	1	4
19	2	1	5
19	2	2	4
19	2	2	5
19	2	2	5
19	2	2	5
19	3	4	4
19	3	4	4
19	3	4	4
19	3	4	4
19	3	2	4
19	3	2	4
19	3	2	4
19	3	2	3
19	3	3	3
19	3	3	3
19	3	3	3
19	3	3	3
19	3	1	4
19	3	1	3
19	3	1	3
19	3	1	3
19	4	1	3
19	4	1	4
19	4	1	3
19	4	1	3
19	4	3	3
19	4	3	3
19	4	3	3
19	4	3	3
19	4	4	3
19	4	4	3
19	4	4	3
19	4	4	3
19	4	2	3
19	4	2	3
19	4	2	3
19	4	2	3
20	1	4	2
20	1	4	2
20	1	4	3
20	1	4	2
20	1	2	2
20	1	2	3
20	1	2	3
20	1	2	4
20	1	3	2
20	1	3	3
20	1	3	2
20	1	3	3
20	1	1	3
20	1	1	3
20	1	1	3
20	1	1	4
20	2	3	2
20	2	3	4
20	2	3	3
20	2	3	2
20	2	4	3
20	2	4	2
20	2	4	2
20	2	4	3
20	2	1	5
20	2	1	4
20	2	1	5
20	2	1	5
20	2	2	2
20	2	2	2
20	2	2	2
20	2	2	2
20	3	2	2
20	3	2	4
20	3	2	3
20	3	2	3
20	3	4	3
20	3	4	2
20	3	4	3
20	3	4	3
20	3	3	2
20	3	3	3
20	3	3	3
20	3	3	3
20	3	1	5
20	3	1	5
20	3	1	5
20	3	1	5
20	4	2	3
20	4	2	2
20	4	2	2
20	4	2	2
20	4	3	3
20	4	3	3
20	4	3	3
20	4	3	4
20	4	1	3
20	4	1	5
20	4	1	5
20	4	1	6
20	4	4	3
20	4	4	3
20	4	4	3
20	4	4	4
